# A genome-wide association study in 10,000 individuals links plasma N-glycome to liver disease and anti-inflammatory proteins

Sodbo Sharapov<sup>1</sup>, Anna Timoshchuk<sup>1</sup>, Olga Zaytseva<sup>2</sup>, Denis Maslov<sup>1</sup>, Anna Soplenskova<sup>1</sup>, Elizaveta E. Elgaeva<sup>3,4</sup>, Evgeny S. Tiys<sup>3</sup>, Massimo Mangino<sup>5,6</sup>, Clemens Wittenbecher<sup>7</sup>, Lennart Karssen<sup>8</sup>, Maria Timofeeva<sup>9,10</sup>, Arina Nostaeva<sup>3,8</sup>, Frano Vuckovic<sup>2</sup>, Irena Trbojević-Akmačić<sup>2</sup>, Tamara Štambuk<sup>2</sup>, Sofya Feoktistova<sup>3</sup>, Nadezhda A. Potapova<sup>11</sup>, Viktoria Voroshilova<sup>3,12</sup>, Frances Williams<sup>5</sup>, Dragan Primorac<sup>13</sup>, Jan Van Zundert<sup>14,15</sup>, Michel Georges<sup>16</sup>, Karsten Suhre<sup>17</sup>, Massimo Allegri<sup>18</sup>, Nishi Chaturvedi<sup>19</sup>, Malcolm Dunlop<sup>9</sup>, Matthias B. Schulze<sup>20,21,22</sup>, Tim Spector<sup>5</sup>, Yakov A. Tsepilov<sup>3,23</sup>, Gordan Lauc<sup>2</sup>, Yurii S. Aulchenko<sup>1,3</sup>

*1 MSU Institute for Artificial Intelligence, Lomonosov Moscow State University, Moscow, Russia;*

*2 Genos Glycoscience Research Laboratory, Borongajska cesta 83H, 10000 Zagreb, Croatia;*

*3 Institute of Cytology and Genetics, Novosibirsk, 630090, Russia;*

*4 Novosibirsk State University, Novosibirsk, 630090, Russia;*

*5 Department of Twin Research and Genetic Epidemiology, School of Life Course Sciences, King's College London, St Thomas' Campus, Lambeth Palace Road, London, SE1 7EH, UK;*

*6 NIHR Biomedical Research Centre at Guy's and St Thomas' Foundation Trust, London SE1 21 9RT, UK;*

*7 Department of Molecular Epidemiology, German Institute of Human Nutrition Potsdam-Rehbruecke, Nuthetal, Germany;*

*8 PolyKnomics, 's-Hertogenbosch 5237 PA, Netherlands;*

*9 Colon Cancer Genetics Group, Cancer Research UK Scotland Centre, Institute of Genetics & Cancer, Western General Hospital, The University of Edinburgh, Edinburgh EH4 2XU, UK;*

*10 D-IAS, Danish Institute for Advanced Study, Department of Public Health, University of Southern Denmark, J.B. Winsløvs Vej 9, DK-5000 Odense C, Denmark;*

*11 Lopukhin Federal Research and Clinical Center of Physical-Chemical Medicine of Federal Medical Biological Agency, Moscow, Russia;*

*12 Vavilov Institute of General Genetics Russian Academy of Sciences, 119991 Moscow, Russia;*

*13 St. Catherine Specialty Hospital, Ulica Kneza Branimira 71E, Zagreb, Croatia;*

*14 Department of Anesthesiology and Multidisciplinary Paincentre, ZOL, Genk/Lanaken, Belgium;*

*15 Department of Anesthesiology and Pain Medicine, Maastricht University Medical Centre, P. Debyelaan 25, Maastricht, 6229 HX, The Netherlands;*

*16 Unit of Animal Genomics, WELBIO, GIGA-R and Faculty of Veterinary Medicine, University of Liège, (B34) 1 Avenue de l'Hôpital, Liège 4000, Belgium;*

*17 Department of Physiology and Biophysics, Weill Cornell Medicine-Qatar, Education City, P.O. Box 24144 Doha, Qatar;*

*18 Centre Lemanique d'antalgie et neuromodulation – EHC - Morges - CH;*

*19 MRC Unit for Lifelong Health & Ageing University College London, London, UK;*

*20 Department of Molecular Epidemiology, German Institute of Human Nutrition Potsdam- Rehbruecke, 14558 Nuthetal, Germany;*

*21 German Center for Diabetes Research (DZD), Neuherberg, 85764, Germany;*

*22 Institute of Nutrition Science, University of Potsdam, Potsdam, Germany;*

*23 Wellcome Sanger Institute, Cambridge, CB10 1RQ, the UK*

Correspondence should be addressed to:

Dr. Yurii S. Aulchenko

yurii@bionet.nsc.ru

Current address:

GSK Medicines Research Centre

Gunnels Wood Road, Stevenage, SG1 2NY, UK

54 **More than a half of plasma proteins are N-glycosylated. Most of them are**  
55 **synthesized, glycosylated, and secreted to the bloodstream by liver and lymphoid**  
56 **tissues. While associations with N-glycosylation are implicated in the rising**  
57 **number of liver, cardiometabolic, and immune diseases, little is known about**  
58 **genetic regulation of this process. Here, we performed the largest genome-wide**  
59 **association study of N-glycosylation of blood plasma proteome in 10,000**  
60 **individuals. We doubled the number of genetic loci known to be associated with**  
61 **blood N-glycosylation by identifying 16 novel loci and prioritizing 13 novel genes**  
62 **contributing to N-glycosylation. Among these were *GCKR*, *TRIB1*, *HP*, *SERPINA1***  
63 **and *CFH* genes. These genes are predominantly expressed in the liver and show**  
64 **previously unknown genetic link between plasma protein N-glycosylation,**  
65 **metabolic and liver diseases, and inflammatory response. By integrating**  
66 **glycomics, proteomics, transcriptomics, and genomics, we provide a resource**  
67 **that facilitates deeper exploration of disease pathogenesis and supports**  
68 **discovery of glycan-based biomarkers.**

69

70

71 During maturation, more than half of human proteins are modified by the covalent  
72 linking of complex carbohydrates – glycans<sup>1</sup>. Glycoproteins comprise various secreted  
73 and membrane enzymes, receptors, hormones, cytokines, immunoglobulins, as well as  
74 structural and adhesion molecules<sup>2</sup>. Glycans affect the physical and chemical properties  
75 of proteins and their biological function<sup>3-6</sup>. Adequate glycosylation is required for the  
76 normal physiological action of glycoproteins, while aberrant glycosylation is increasingly  
77 implicated in human diseases<sup>7-9</sup>. Glycans are considered to be potential therapeutic  
78 targets<sup>10-12</sup>, essential part of therapeutics<sup>13-15</sup>, as well as biomarkers<sup>16-18</sup>, which makes  
79 glycobiology a promising field for future clinical applications.

80 N-glycosylation is the most abundant type of glycosylation<sup>1</sup> and, unlike other  
81 types, is specific to a consensus asparagine-containing sequence (Asn-X-Ser/Thr,  
82 where X is any amino acid except Pro) in the protein's primary structure. Human N-  
83 glycans are irregular branched polymers consisting of mannose, galactose, fucose,  
84 sialic acid, and *N*-acetylglucosamine (GlcNAc) residuals, whose combinations introduce  
85 a great diversity of protein glycoforms. Unlike proteins, whose primary structure is  
86 encoded in the genomic DNA sequence, the occupancy of the N-glycosylation site, and  
87 the abundance of specific N-glycan structures are not directly encoded in the human  
88 genome. Protein glycosylation depends on the interplay of multiple enzymes catalyzing

89 glycan transfer, glycosidic linkage hydrolysis, and glycan biosynthesis. The abundance  
90 of specific protein glycoforms can be influenced by various parameters, including the  
91 activity of enzymes and availability of substrates, the accessibility of a glycosylation site,  
92 protein synthesis, and degradation<sup>19</sup>. Overall, protein glycosylation is a complex  
93 process controlled by genetic, epigenetic, and environmental factors<sup>20–22</sup>.

94 While the biochemical network of human N-glycan biosynthesis is well  
95 understood<sup>23</sup>, little is known about *in vivo* regulation of this process<sup>24</sup>, including tissue-  
96 and protein-specific regulation. A major part of the plasma glycoproteins consists of  
97 immunoglobulins, produced by antibody-producing B-cells, and secreted proteins  
98 produced in the liver<sup>25</sup>. Therefore, the N-glycosylation of blood plasma proteins serves  
99 as an indicator of liver and B-cell function. Study of plasma protein N-glycosylation  
100 potentially provides insights into the etiology and pathophysiology of liver and B-cell-  
101 mediated diseases, as well as diseases where these tissues are important players, such  
102 as cardiometabolic diseases and inflammatory conditions. Understanding the  
103 mechanisms underlying blood plasma glycosylation and its regulation at the tissue-  
104 specific level is crucial for unraveling the complex interplay between protein  
105 modifications, cellular functions, and disease processes.

106 In this context, genetics offers an attractive approach to studying regulation of N-  
107 glycosylation *in vivo* and sheds light on how these molecular phenotypes are linked to  
108 human disease<sup>25,26</sup>. Abundance of total plasma N-glycans can be quantified through  
109 various analytical methods<sup>27</sup>. As for other quantitative phenotypes, the genome-wide  
110 association study (GWAS) and multivariate genetic association analysis<sup>28,29</sup> may be  
111 applied to N-glycans to identify genetic loci associated with abundance and, therefore,  
112 contain genes involved in the regulation of N-glycosylation. Further integration of N-  
113 glycome GWAS results with other layers of biological information (e.g., biological  
114 pathways, protein-protein interactions, transcriptomics, proteomics, and others) allows  
115 the discovery of novel candidate genes regulating this process and provides hypotheses  
116 about biological mechanisms underlying the genetic associations<sup>30,31</sup>. A joint analysis of  
117 GWAS results of N-glycome and disease (e.g., pleiotropy analysis<sup>32</sup> and analysis of  
118 causal relationships using Mendelian randomization<sup>33</sup>) can shed light on how protein  
119 glycosylation is involved in pathogenesis of human disease and suggest possible  
120 glycome-based biomarkers. Previous GWAS of total plasma N-glycome<sup>34–37</sup> identified  
121 15 genetic loci and suggested the role of 19 candidate genes. These studies were  
122 supplemented with GWAS of N-glycome of immunoglobulin G (IgG)<sup>28,38–41</sup> and  
123 transferrin (TF)<sup>42</sup> glycoproteins, identifying an additional 19 loci and prioritizing 26

124 candidate genes<sup>25</sup>. The role of three candidate genes, encoding transcriptional factors  
125 *HNF1A*, *IKZF1*, and *RUNX3*, in the regulation of N-glycosylation was experimentally  
126 confirmed *in vitro*<sup>34,40</sup>. A Mendelian randomization study of IgG N-glycome found that  
127 the abundance of N-glycans with bisecting GlcNAc is a potential biomarker of systemic  
128 lupus erythematosus<sup>43</sup>. However, there remains a limited understanding of the role of  
129 genes-regulators of N-glycosylation in health and disease.

130 The first aim of this study was to identify novel glycome quantitative trait loci  
131 (glyQTLs), prioritize novel candidate genes, and reconstruct tissue-specific gene  
132 networks that regulate plasma protein glycosylation. For this, we performed the largest  
133 genome-wide association meta-analysis (GWAMA) of total plasma N-glycome using  
134 data from seven studies (N = 10,764). For replicated glyQTLs, we prioritized candidate  
135 genes using a broad spectrum of methods and explored how these genes are  
136 connected in a functional tissue-specific network that regulates protein glycosylation.  
137 The second aim of this study was to identify potential glycan biomarkers for disease.  
138 We performed a phenome-wide association study (PheWAS) in conjunction with  
139 colocalization analysis to investigate the pleiotropic effects of glyQTLs on complex  
140 diseases. Next, we correlated genetically predicted glycan levels in 450,000 UK  
141 Biobank samples with the disease's endpoints. Finally, we conducted a bidirectional  
142 Mendelian randomization study to identify potential causal effects between glycans and  
143 disease. This strategy not only resulted in the discovery of new candidate genes but  
144 also suggested how some of these genes might regulate glycosylation enzymes and  
145 how they are linked to the aberrant glycosylation observed in disease.

## 146 Results

### 147 Single- and multi-trait GWASs for 138 N-glycome traits

148 The levels of 36 N-glycan structures (Supplementary Table 3a, 3c) linked to various  
149 plasma glycoproteins were measured by ultra-high performance liquid chromatography  
150 in seven participating cohorts from six countries. Majority of 10,764 participants (94.5%)  
151 were of European ancestry. From the 36 directly measured N-glycans, we computed 81  
152 derived N-glycome traits such as the total level of fucosylation, galactosylation,  
153 sialylation and others, reflecting pathways of N-glycan biosynthesis (Supplementary  
154 Table 3a). We conducted GWAS for each of these 117 N-glycome traits in each of the  
155 seven participating cohorts, assuming an additive model of the genetic effect. We then  
156 performed a fixed-effect discovery meta-analysis of the subcohorts that included

157 participants of European descent (N = 7,540) (Supplementary Table 1b). After meta-  
158 analysis, we took advantage of the correlation structure between 117 N-glycome traits  
159 and performed GWAS of 21 multivariate N-glycome traits defined based on their  
160 biochemical similarities (Supplementary Table 1b).

161 The size of the replication sample (N = 3,224, Supplementary Table 1b) was  
162 defined as to achieve 80% statistical power for a replication of the true association  
163 signal (Supplementary Note).

164 The genomic control inflation factor in the discovery GWAMA varied from 1.004  
165 to 1.059. By contrast, an intercept of LD score regression<sup>44</sup> varied from 0.996 to 1.002  
166 (Supplementary Table 4c), confirming minimal impact of genetic stratification on the  
167 GWAS results. Hence, implementing Genomic Control correction in the analysis was  
168 unnecessary.

169 Our analyses identified and replicated a total of 40 loci (**Fig. 1a**, Supplementary  
170 Table 5a, Supplementary Table 5b) that were significantly associated with at least one  
171 of 117 N-glycome traits and 21 multivariate N-glycome traits. The association of 25 loci  
172 with total plasma N-glycome was shown and replicated for the first time (**Table 1**), while  
173 the association of 15 loci confirms previous findings<sup>36,37</sup>.

174 We performed an approximate conditional and joint analysis implemented in  
175 GCTA-COJO<sup>45</sup> to identify conditionally independent association signals in the replicated  
176 loci on discovery GWAMA. We found evidence of multiple SNPs contributing  
177 independently to glycan level variation for nine loci (Supplementary Table 6a). Seven of  
178 these loci span glycosyltransferase genes, coding for enzymes directly involved in the  
179 biosynthesis of glycans. Two sentinel associations were observed in the loci containing  
180 fucosyltransferases *FUT8* and *FUT6*, sialyltransferases *ST6GAL1* and *ST3GAL4*,  
181 galactosyltransferase *B4GALT1*, glycuronyltransferase *B3GAT1*, and the  
182 acetylglucosaminyltransferase *MGAT5*. Beyond glycosyltransferase loci, the locus  
183 spanning the human leukocyte antigen (*HLA*) and the locus containing *HPR* gene  
184 showed secondary associations.

#### 185 SNP-based heritability and whole genome polygenic scores for 117 N-glycome traits

186 For 117 N-glycome traits we estimated SNP-based heritability using LD Score  
187 regression<sup>44</sup>. For 68 N-glycome traits SNP-based heritability was above zero at nominal  
188  $P \leq 0.05$ , varying from 10.2% to 33.4% ( $19.8 \pm 10.3\%$ ) (Supplementary Table 4c), which  
189 is on average 2.5x lower than the narrow-sense heritability of 37 N-glycome traits,  
190 estimated in a twins-based study –  $50.6 \pm 14.0\%$ <sup>46</sup>.



191 For each of the 117 N-glycome traits, we created polygenic score (PGS) models  
192 based on the GWAMA of European-ancestry participants (N = 10,172) using the  
193 SBayesR method<sup>47</sup>. We tested the out-of-sample prediction accuracy of these models in  
194 the CEDAR dataset (N=187 participants of European ancestry). For 79 N-glycome traits  
195 in CEDAR samples, PGS models explained from 2.4% to 20.0% of the trait variance  
196 (FDR < 5%), allowing for calculation of genetically predicted glycan levels in large scale  
197 cohorts of European descent (e.g., UKBiobank). For the remaining 38 N-glycome traits  
198 the explained variance did not deviate significantly from zero (FDR > 5%). The out-of-  
199 sample prediction accuracy correlated significantly with the SNP-based heritability  
200 ( $R = 0.48$ ,  $P = 4.05 \times 10^{-8}$ ). The implementation of SBayesR models is detailed in  
201 Supplementary Table 7.

## 202 [Prioritization of causal genes for protein N-glycosylation](#)

203 Identification of genes, rather than genetic loci, can help to find novel protein  
204 glycosylation regulators and suggest targets for intervention in glycome-related  
205 diseases. To prioritize the most likely effector genes, we employed a consensus-based  
206 prioritization approach selecting the gene with the highest unweighted sum of evidence  
207 from eight different predictors - based on a literature search of genes encoding known  
208 enzymes and regulators of N-glycan biosynthesis; genes causing congenital disorders  
209 of glycosylation; colocalization of glyQTLs with eQTLs and blood plasma pQTLs;  
210 annotation of putative causal variants affecting protein structure; enrichment of gene  
211 sets and tissue-specific expression; and prioritization of the nearest gene (see  
212 Methods). We prioritized the most likely effector gene for each locus by selecting the  
213 gene with the highest unweighted sum of evidence across all eight predictors<sup>48</sup>,  
214 provided a gene was supported by at least two predictors.

215 We prioritized candidate genes in 31 of the 40 glyQTLs (Supplementary Table  
216 6b). The prioritized genes may regulate the protein N-glycosylation through several  
217 known general mechanisms: biosynthesis of N-glycans, abundance of N-glycoproteins  
218 in the blood, regulation of transcription in lymphoid and gastrointestinal tissues, and ion  
219 homeostasis in the endoplasmic reticulum and Golgi apparatus.

220 Among the 31 prioritized genes (**Fig. 2b**), we identified nine genes encoding  
221 glycosyltransferases (*MGAT5*, *ST6GAL1*, *B4GALT1*, *ABO*, *ST3GAL4*, *B3GAT1*, *FUT8*,  
222 *FUT6*, *MGAT3*); mutations in three are known to lead to congenital disorders of  
223 glycosylation (*B4GALT1*, *FUT8*, *SLC39A8*) and four genes have strong experimental  
224 support for being regulators of N-glycan biosynthesis genes (*HNF1A*, *IKZF1*, *RUNX3*,

225 *SLC39A8*)<sup>25</sup>. The SMR/HEIDI approach indicated that total plasma N-glycosylation–  
226 associated variants in two loci possibly had pleiotropic effects on plasma levels of two  
227 blood proteins (HPT, CAFH) (Supplementary Table 6g) and transcription of 10 genes in  
228 different tissues (Supplementary Table 6f). In 12 genes, associated variants were either  
229 coding or were in strong LD with the variants coding for potentially deleterious amino  
230 acid changes (annotated by Variant Effect Predictor, VEP<sup>49</sup>), and in 5 genes -  
231 pathogenic amino acid changes (predicted by FATHMM XF<sup>50</sup> and FATHMM InDel<sup>51</sup>).  
232 The DEPICT gene prioritization tool<sup>31</sup> provided evidence of prioritization for 19 genes in  
233 18 loci at FDR < 0.2 (Supplementary Table 6h).

234 Because not all the glyQTLs were colocalized with a cis-eQTL, cis-pQTL or lay in  
235 proximity to biologically relevant genes, we also utilized the nearest protein-coding  
236 genes as an independent predictor. This approach was chosen due to the tendency of  
237 the nearest protein-coding genes to enrich for molecular QTLs<sup>52</sup>.

238 In the following discussion, we focus on thirteen novel candidate genes that were  
239 not identified before in GWASs of human protein N-glycosylation; for the latter, we refer  
240 a reader to previous works and published reviews<sup>25</sup>. We prioritized four genes  
241 associated with lipid metabolism regulation - *GCKR*, *FADS2*, *TRIB1*, and *GRAMD1B*  
242 which, to our knowledge, is the first time protein N-glycosylation has been linked to  
243 genes involved in lipid metabolism and its regulation; four genes encoding N-  
244 glycoproteins having anti-inflammatory function - *HP*, *HRP*, *SERPINA1* and *CFH*; the  
245 gene *SCL39A8* encoding a zinc transporter; three genes encoding transcription factors -  
246 *MAX*, *NFKB1*, *MYRF*; and a glycosyltransferase gene *ABO*, which determines an  
247 individual's ABO blood type.

248 The Supplementary Note provides an in-depth account of the details of thirteen  
249 newly prioritized genes. The other genes that have been previously prioritized  
250 elsewhere are described in Timoshchuk et al.<sup>25</sup>.

## 251 Tissue-specific regulation of plasma protein N-glycosylation

252 Lymphoid tissue, specifically plasma cells that produce antibodies, and liver,  
253 specifically hepatocytes, contribute the majority of glycoproteins present in human  
254 blood<sup>2,25</sup> and are thus the primary drivers of N-glycosylation of plasma proteome.  
255 However, the N-glycosylation machinery in these two cell types varies, leading to  
256 distinct spectra of glycans attached to proteins produced in these two tissues<sup>2,46</sup>. Many  
257 glycosylation-associated genes prioritized in this study are expressed in plasma cells, or  
258 hepatocytes, or both (**Fig. 2a**).

259 To gain a deeper understanding of the tissue-specific regulation of glyco-genes,  
260 we constructed a gene network for N-glycosylation regulation. This network comprised  
261 32 loci that were replicated in the univariate association analysis, and 117 N-glycome  
262 traits as vertexes, with significant associations between them represented as edges  
263 (**Fig. 1b**). The resulting network revealed two major subnetworks, wherein candidate  
264 genes and glycan traits were clustered. The first subnetwork was primarily associated  
265 with blood plasma N-glycans typically produced in the liver, and included 13 loci  
266 (*ATF6B*, *B3GAT1*, *CHST2*, *FUT6*, *HNF1A*, *HP*, *LINC02714*, *MAX*, *MGAT5*, *MLXIPL*,  
267 *SERPINA1*, *ST3GAL4*, *TRIB1*). The second subnetwork was related to blood plasma N-  
268 glycans typically attached to immunoglobulins and consisted of 14 loci (*B4GALT1*,  
269 *ELL2*, *HIVEP2*, *IKZF1*, *MEF2B*, *MGAT3*, *RUNX1*, *SLC38A10*, *SLC39A8*, *SMARCB1*,  
270 *SMARCD3*, *TNFRSF13B*, *TMEM121*, *TXLNB*). According to classification of Clerc et  
271 al.<sup>2</sup>, genetic variation in five loci (containing *FUT8*, *GCKR*, *GRAMD1B*, *RUNX3*, and  
272 *ST6GAL1*) had an impact on plasma N-glycans attached to both immunoglobulins and  
273 liver-secreted proteins. Most of these five loci exhibited strong bias towards N-glycans  
274 known to be preferentially expressed on proteins produced in one of the tissues, i.e.,  
275 *GRAMD1B* was associated with 8 N-glycans, of which 7 were typical for liver proteins;  
276 *GCKR* – with 9, of which only one was typical for immunoglobulins; *RUNX3* and  
277 *ST6GAL1* were preferentially associated with N-glycans typically attached to  
278 immunoglobulins (32/35 and 43/44 glycans, respectively). It should be noted that the  
279 classification of Clerc et al.<sup>2</sup> was compiled based on a large body of literature data, and  
280 we cannot exclude occasional misclassification.

281 To gain insight into the spectrum of glycans that were associated to the 8 loci that  
282 were replicated in multivariate association analysis, we considered significant (at  
283  $p < 0.01/36$ ) association of the partial regression coefficients in the multivariate analysis  
284 of trait set “N-glycosylation” (36 traits) (Supplementary Table 5e). In this analysis,  
285 *DIPK1A*, *FADS2*, and *CALB2* loci associated with N-glycans typical for liver-secreted  
286 proteins; *LOC107985440* – with N-glycans typically observed on immunoglobulins IgG.  
287 Results for *ST3GAL6* and *LOC157273* were inconclusive, although the former was  
288 associated with the multivariate trait “high branching N-glycans”; such glycans are  
289 typical for liver-secreted proteins.

290 Three loci showed clear effect on N-glycans found on both liver-secreted  
291 glycoproteins and immunoglobulins: *FUT8* (significant effect on 9 N-glycans typically  
292 attached to liver-secreted proteins and 3 typically attached to immunoglobulins); *CFH* (2  
293 and 2, respectively) and *ABO* (also 2 and 2).



294 TF and IgG are two proteins secreted by hepatocytes and plasma cells,  
295 respectively, and GWASs of their N-glycosylation shed light on the genetic control of  
296 protein N-glycosylation in the corresponding tissues<sup>42</sup>. To gain further insights into the  
297 mechanism of association and to support the tissue-specificity of the loci, we conducted  
298 a colocalization analysis of total plasma, IgG and TF glyQTLs using the SMR- $\theta$   
299 method<sup>53</sup>. The analysis was restricted to the loci that were previously implicated in TF<sup>42</sup>  
300 N-glycome or IgG<sup>40</sup> N-glycome GWASes, and reached genome-wide significance in  
301 univariate association analysis in this study. Excluding *HLA*, this selection resulted in 21  
302 loci, of which 15 were significant in previous IgG N-glycome GWAS only, four were only  
303 significant in the TF N-glycome GWAS, and two (*FUT6* and *FUT8*) were significant in  
304 both (Supplementary Table 5d)<sup>25</sup>. For specific locus, we colocalized signals of genetic  
305 association for traits that have reached genome-wide significance in that locus.

306 The results of colocalization analysis are presented in Supplementary Figures 3.  
307 If regional genetic associations of a plasma N-glycome trait colocalized ( $|\theta| > 0.7$ ) with  
308 genetic associations of an IgG N-glycome trait, we considered this as evidence that the  
309 locus is expressing its effect on plasma N-glycome through its effect on IgG N-  
310 glycosylation, acting in antibody-producing cells. Similarly, colocalization with genetic  
311 association signal for TF N-glycome was taken as an indication that the locus may  
312 exhibit its action via effect of TF N-glycome, acting in liver. The analysis suggested that  
313 the *ELL2*, *TXLNB*, *HIVEP2*, *IKZF1*, *SMARCD3*, *TMEM121*, *SLC38A10*, *MEF2B*,  
314 *ATF6B*, *RUNX1*, *RUNX3*, *SMARCB1*, *MGAT3*, *ST6GAL1*, *B4GALT1* loci regulate N-  
315 glycosylation of IgG while *MGAT5*, *ST3GAL4*, *B3GAT1*, *HNF1A* loci regulate N-  
316 glycosylation of TF. The *FUT8* and *FUT6* act as regulators of both glycoproteins. An  
317 interesting case of pleiotropy was observed in the *FUT8* locus. The colocalization signal  
318 in *FUT8* split into two distinct clusters (Supplementary Fig. 3, page 120), one of which  
319 was dominated by N-glycans predominantly presented on proteins produced in the liver,  
320 while the other was almost exclusively presented by these on immunoglobulins. To  
321 support the hypothesis of two distinct tissue-specific genetic mechanisms in the locus,  
322 we combined traits from the two clusters into single traits using MANOVA approach<sup>28</sup>  
323 and performed a colocalization analysis between the two constructed linear  
324 combinations using the SMR- $\theta$  method<sup>53</sup> and R Coloc package<sup>54</sup>. We found strong  
325 evidence *against* colocalization of N-glycans presented on liver-specific proteins and  
326 these on immunoglobulins in this genomic region (PP.H3 = 100%, where PP.H3 is the  
327 posterior probability that there are two distinct causal variants contributing to trait  
328 variation,  $\theta = 4 \times 10^{-6}$ ). This supports the hypothesis that genetic regulation of *FUT8* in

329 the liver and antibody-producing cells follows two distinct mechanisms, as previously  
330 suggested by Landini and colleagues<sup>42</sup>.

331 Thus, the colocalization analysis confirms different tissue-specific mechanisms of  
332 genetic regulation for each locus. With an exception of the *ATF6B* and *FUT6* loci, the  
333 results from colocalization are largely consistent with the classification based on gene-  
334 N-glycan association network.

335 Our findings demonstrate that the genetic regulation of protein N-glycosylation is  
336 highly tissue-specific. Even glycosyltransferases such as *FUT8*, *FUT6*, *MGAT3*,  
337 *ST6GAL1* and *B4GALT1*, being expressed in antibody-producing cells and hepatocytes  
338 (Fig. 2a) and known to participate in the N-glycan biosynthesis in both tissues, display  
339 pronounced tissue-specific genetic regulation that is not shared between different  
340 tissues.

#### 341 [PheWAS highlights loci associated with an extensive number of diseases and](#) 342 [quantitative traits](#)

343 In this study, we examined the pleiotropic effects of 40 replicated glyQTLs on over a  
344 thousand diseases and quantitative traits endpoints (as listed in Supplementary Table  
345 8a) using the SMR/HEIDI method. Our analysis revealed a total of 1,214 significant  
346 associations, of which 781 demonstrated a non-rejection of the pleiotropy hypothesis by  
347 the HEIDI test. The identified pleiotropic associations encompassed a wide range of  
348 phenotypes, including type 2 and type 1 diabetes, blood glucose levels, coronary artery  
349 disease, cholesterol levels, bipolar disorder, schizophrenia, gout, various oncological  
350 diseases, metabolomic and anthropometric traits, lifestyle and diet-related traits, general  
351 life history and overall health status, among others (as depicted in **Fig. 3a, 3b** and  
352 Supplementary Table 8b). Additionally, *TRIB1* and *GCKR* showed colocalization with  
353 metabolic dysfunction-associated steatotic liver disease (*TRIB1*:  $P_{SMR} = 4.58 \times$   
354  $10^{-8}$ ,  $P_{HEIDI} = 0.03$  (possibly shared); *GCKR*:  $P_{SMR} = 3.26 \times 10^{-8}$ ,  $P_{HEIDI} = 0.73$  (likely  
355 shared)).

356 Hierarchical clustering based on sets of colocalized traits allowed us to differentiate  
357 four distinct groups of loci (**Fig. 3a**, right panel). The first cluster (**Fig. 3a**, topmost  
358 cluster) was characterized by a high number of metabolic colocalizations and  
359 encompassed eight of the ten most pleiotropic loci (**Fig. 3c**). It was also found to be  
360 colocalized with a diverse range of other phenotypes, including disease and  
361 anthropometric traits. Of particular note, this cluster comprised loci with prioritized lipid  
362 metabolism genes, namely, *GCKR*, *TRIB1*, *FADS2* and previously known *HNF1A*.

363 Furthermore, it encompassed the locus containing the *MLXIPL* gene, a transcriptional  
364 factor that induces liver glycolysis and lipogenesis, as well as *ABO*, which is known to  
365 be associated with stroke<sup>55</sup>, metabolic dysfunction-associated steatotic liver disease  
366 and levels of lipids<sup>56,57</sup>.

#### 367 [Association between PGS for plasma N-glycosylation traits and ICD-10 diseases](#)

368 We analyzed associations between polygenic scores (PGS) for the 117 plasma  
369 N-glycosylation traits and 167 diseases classified according to International  
370 Classification of Diseases (ICD)-10 in individuals of European ancestry from the UK  
371 Biobank cohort (N = 374,303) (Supplementary Note). The analysis revealed 14  
372 diseases associated with PGS for at least one plasma N-glycome trait and PGS for 35  
373 plasma N-glycome traits associated with at least one disease at the designated  
374 significance threshold of  $p < 1.07 \times 10^{-5}$  (**Fig. 4**, Supplementary Table 9). Full results  
375 and overview of the analysis are provided in the Supplementary Note.

376 Notably, we observed positive associations between PGS for traits, related to the  
377 increased levels of high-mannose glycans, especially to those of containing nine  
378 mannose residuals (M9), with cardiovascular disease phenotypes such as essential  
379 hypertension, ischemic heart disease, angina, hyperlipidaemias, as well as type 1  
380 diabetes and asthma (**Fig. 4**).

381 We found negative associations for the PGS for S0 total (percentage of neutral  
382 N-glycan structures, i.e. N-glycans without sialic acid, in total plasma N-glycans) with  
383 primary hypertension, lipidaemias, obesity and non-insulin dependent diabetes (**Fig. 4**).  
384 Moreover, PGS for the N-glycome traits describing the abundances of galactosylated  
385 structures were negatively associated with obesity, lipoprotein metabolism disorders,  
386 primary hypertension and type 2 diabetes (**Fig. 4**).

#### 387 [Bidirectional Mendelian Randomization analysis of causal effects between plasma N- 388 glycosylation traits and ICD-10 diseases](#)

389 For the statistically significantly associated pairs of disease-plasma N-glycome  
390 traits in UK Biobank we conducted bidirectional two-sample Mendelian randomization  
391 (MR) analysis to investigate the direction of effects.

392 Using the disease phenotype as exposure, we conducted a two-sample MR  
393 analysis and revealed statistically significant positive causal effect of disorders of  
394 lipoprotein metabolism on M9 (N-glycan with nine mannose residuals) and on Mtotal  
395 (the percentage of high-mannose structures in total plasma glycans) (**Table 2**,  
396 Supplementary Table 10b, Supplementary Fig. 6a-d, 7a-d). The direction of the causal

397 effect corresponded to the signs of the beta of association between disorders of  
398 lipoprotein metabolism and other lipidaemias (E78) and PGS for M9 and Mtotal.  
399 Sensitivity analyses, including a two-sample MR after removal of pleiotropic IVs, as well  
400 confirmed the observed causal effects of lipidaemias (E78) on M9 and Mtotal  
401 (Supplementary Fig. 8a-d, 9a-d; Supplementary Tables 11a-c, 13a-c, Supplementary  
402 Note).

403 Using plasma N-glycome trait as exposure we performed MR analysis in the  
404 opposite direction, discovering a statistically significant positive causal effect of M6n,  
405 percentage of M6 in total neutral plasma glycans on asthma and a positive effect of  
406 M9n, percentage of M9 in total neutral plasma glycans, on disorders of lipoprotein  
407 metabolism and other lipidaemias (**Table 2**, Supplementary Table 10a, Supplementary  
408 Fig. 4a-d; 5a-c). In both cases, the direction of the effect was concordant with the  
409 direction of association between corresponding pairs of disease and PGS. Sensitivity  
410 analyses also confirmed the observed causal effect (Supplementary Tables 11a-c).  
411 Since the number of available IVs for both M6n and M9n was not sufficient for the  
412 analysis of pleiotropy among the IVs using MR-PRESSO<sup>58</sup>, as an additional sensitivity  
413 analysis for the effects of M6n on asthma and M9n on lipidaemia we performed  
414 colocalization (SMR-HEIDI) analysis for the loci tagged by the genetic variants used as  
415 IVs in these cases (Supplementary Table 12). SMR-HEIDI analysis provided evidence  
416 for one shared causal variant (rs144126567,  $p_{SMR} = 0.003$ ;  $p_{HEIDI} = 0.30$ ) for M6n and  
417 asthma but did not find any proof for existence of shared genetic variants influencing  
418 M9n and lipidaemia (Supplementary Table 12). Therefore, we report an observed  
419 positive effect of M6n on asthma, while the presence of a positive effect of M9n on  
420 lipidaemia remains inconclusive. Full results of MR analysis are presented in  
421 Supplementary Tables 10a-b.

## 422 Discussion

423 Here, we reported 40 quantitative trait loci (glyQTLs) discovered in the GWAS of  
424 138 blood plasma N-glycome traits, resulting in a more than two-fold expansion of loci  
425 affecting N-glycosylation of blood plasma proteins. The integration of these findings  
426 with genetic information related to human diseases and other complex phenotypes  
427 allowed us to show for the first time that genes involved in liver function are linked to the  
428 human blood plasma protein N-glycosylation.

429 A subset of newly prioritized genes allows us to postulate a link between genetic  
430 regulation of metabolic and liver diseases and blood plasma protein N-glycosylation.

431 Specifically, common genetic variation in the loci near *GCKR* and *TRIB1* is known to  
432 predispose to metabolic dysfunction-associated steatotic liver disease (MASLD)<sup>59</sup>.  
433 Moreover, genetic association signal for MASLD in these loci are colocalized with the  
434 corresponding glyQTLs. In the gene *SERPINA1*, rare Mendelian mutations lead to  
435 alpha-1 antitrypsin (AAT) deficiency, with liver disease as part of the phenotype.  
436 Common variation in this region associates with chronic elevation of alanine  
437 aminotransferase (cALT) levels<sup>60</sup>, a proxy phenotype for MASLD.

438 Although on phenotypic level, the changes of total and liver secreted protein-  
439 specific N-glycosylation in liver disease are well-known<sup>61-63</sup>, we demonstrate, for the  
440 first time, that specific genes are associated with both N-glycosylation and liver disease,  
441 offering a starting point for genetically-guided investigation of the functional  
442 mechanisms of this phenotypic association.

443 Somewhat superficially, we may reason that liver disease is characterized by  
444 hepatocyte injury and endoplasmic reticulum stress<sup>64</sup>, which is strongly associated with  
445 changes in glycosylation. A less direct mechanism could be inflammation, that is a  
446 hallmark of liver disease, with proinflammatory cytokines shown to alter the substrate  
447 synthesis pathways as well as the expression of glycosyltransferases required for the  
448 biosynthesis of N-glycans<sup>65</sup>. Thus, changes in N-glycosylation observed in blood  
449 plasma may be at least partly explained by altered N-glycosylation of hepatocyte-  
450 secreted proteins. Consistently with this hypothesis, we demonstrate that common  
451 genetic variation in the three loci known to be associated with liver disease is  
452 associated with variation in abundance of N-glycans, typically attached to the liver-  
453 secreted proteins.

454 Other notable, partly overlapping, subset of liver-expressed genes newly  
455 implicated in plasma protein N-glycosylation encodes anti-inflammatory proteins --  
456 haptoglobin (HP, *HP*), complement factor H (CFAH, *CFH*), and alpha-1-antitrypsin  
457 (AAT, *SERPINA1*). The glyQTLs located at *HP* and *CFH* are colocalized with the  
458 corresponding pQTLs. At least two mechanisms may be suggested to explain such  
459 colocalization. Genetic variants in these loci may affect the composition of blood N-  
460 glycosylation through changes in the abundance of glycans preferentially bond to HP  
461 and CFAH by regulating the level of these glycoproteins in the blood. Alternatively, the  
462 genetic variation may change glycosylation of these proteins, which, in turn, could  
463 change the affinity of the binding of the specific probes used by the SomaLogic assays.  
464 While we did not observe colocalization between *SERPINA1* glyQTL and the AAT  
465 pQTL, this may be a false negative, potentially explained by the low frequency of the



466 *SERPINA1* lead variant (rs28929474). Nonetheless, the rs28929474 is associated with  
467 the level of glycoprotein acetyl, a mixture of N-glycoproteins, predominantly  
468 alpha-1-acid glycoprotein, haptoglobin, and alpha-1-antitrypsin<sup>66</sup>.

469 While variation at *HP* and *SERPINA1* loci is associated with changes in N-  
470 glycans typically attached to liver proteins, *CFH* locus appears to also affect N-glycans  
471 typically attached to immunoglobulins. While *CFH* does express at some level in plasma  
472 cells (**Fig. 2a**), we speculate that perhaps a more likely mechanism is that genetic  
473 variation in *CFH* affects its expression liver, and changes in N-glycans attached to  
474 immunoglobulins occur through a systemic mechanism, i.e., regulation of inflammation.  
475 Consistent with this hypothesis is the known association of the *CFH* locus with IgA  
476 nephropathy<sup>67</sup>, as well as indications that in mice, that CFH modulates splenic B cell  
477 development and limits autoantibody production<sup>68</sup>.

478 Our results suggest that genetic regulation of plasma protein N-glycosylation  
479 predominantly occurs in lymphoid and liver tissue and exhibits strong tissue specificity.  
480 Integration of evidence from transcriptomics and N-glycomics suggests that molecular  
481 expression of genetic variation in the majority of glyQTLs is restricted to one tissue; the  
482 effects of this variation on N-glycans in blood plasma occur either through changes of  
483 N-glycosylation of the proteins secreted by the tissue, or through systemic mechanisms.  
484 Of note, all of N-glycosyltransferase genes that express on RNA, protein, and glycan  
485 levels in both tissues, are genetically regulated in only one of them (*B4GALT1*,  
486 *ST6GAL1*, *MGAT3*), or exhibit different glyQTLs in different tissues (*FUT8*, *FUT6*). Even  
487 thus, while a number of glycosyltransferases are expressed both in liver and lymphoid  
488 tissues, we provide evidence that the genetic variation regulating N-glycosylation in  
489 each of the two tissues is unique and does not overlap at the available resolution of the  
490 analysis. To the best of our knowledge, this is the first study to analyze and reveal the  
491 strong tissue-specificity of the genetic regulation of population variability of human  
492 protein N-glycosylation.

493 Further studies of the genetic regulation of N-glycosylation of individual proteins  
494 rather than bulk N-glycome will lead to the discovery of novel glyQTLs, which we cannot  
495 observe now due to a lack of power or noise in bulk N-glycome. Quantification of the N-  
496 glycome of purified proteins like IgG<sup>40</sup>, TF<sup>42</sup>, IgA<sup>69,70</sup>, and apolipoprotein CIII<sup>71</sup>, and  
497 other proteins, will be highly relevant to understanding the etiology of such disease, as  
498 rheumatoid arthritis, hepatocellular carcinoma, IgA nephropathy, endocarditis<sup>7</sup>.  
499 Alternatively, development and application of computational deconvolution approaches  
500 may be similar to those applied for bulk RNA-Seq<sup>72</sup>.

501 In conclusion, our study offers insight into the genetic factors influencing blood  
502 plasma N-glycome, and, for the first time, establishes a genetic link between N-  
503 glycosylation, liver disease, and anti-inflammatory proteins. The identification of novel  
504 genes associated with metabolic and liver disease and N-glycosylation contributes to  
505 deeper understanding of shared biological mechanisms and will facilitate future  
506 biomarker discovery and interpretation.

## 507 **Methods**

508 We conducted a multicenter study using data from seven studies – TwinsUK (N =  
509 3,918), EPIC-Potsdam (N = 2,192), PainOmics (N = 1,873), SOCCS (N = 1,742),  
510 SABRE (N = 544), QMDiab (N = 325), and CEDAR (N = 170) with a total sample size N  
511 = 10,764. Local research ethics committees approved all studies, and all participants  
512 gave written informed consent. The detailed description of the cohorts is shown in  
513 Supplementary Table 1 and Supplementary Notes.

### 514 **Glycome measurement and phenotype processing**

515 Plasma N-glycome quantification of samples from all but SOCCS studies was  
516 performed at Genos Ltd using the protocol published previously<sup>73</sup>. Briefly, plasma N-  
517 glycans were enzymatically released from proteins by PNGase F, fluorescently labeled  
518 with 2-aminobenzamide and cleaned-up. Fluorescently labeled and purified N-glycans  
519 were separated by HILIC on a Waters BEH Glycan chromatography column. The  
520 fluorescence detector was set with excitation and emission wavelengths of 250 nm and  
521 428 nm, respectively. Plasma N-glycome quantification for SOCCS samples was done  
522 at NIBRT by applying the same protocol with the only difference in the excitation  
523 wavelength (330 nm instead of 250 nm). Glycan peaks (GPs) – quantitative  
524 measurements of glycan levels – were defined by manual integration of intensity peaks  
525 in the chromatograms or were defined by automatic integration. The number of defined  
526 GPs varied among studies from 36 to 42, therefore to conduct multi-center association  
527 analysis followed by meta-analysis, we harmonized the set of GPs by applying a  
528 recently published protocol<sup>34</sup> to a harmonized set of 36 GPs. To reduce experimental  
529 variation in glycan measurements, before genetic studies, raw glycan data were  
530 probabilistic median quotient normalized<sup>74,75</sup> and batch corrected centrally by the  
531 phenotype provider (Genos Ltd). More detailed information on glycan preprocessing can  
532 be found in the Supplementary Note. From the 36 directly measured glycan traits, 81  
533 derived traits were calculated (Supplementary Table 3a). These derived traits average

534 glycosylation features such as branching, galactosylation, and sialylation, etc, across  
535 different individual glycan structures and, consequently, they may be more closely  
536 related to individual enzymatic activity and underlying genetic polymorphism.

### 537 [Discovery and replication genetic association analysis](#)

#### 538 [Single trait association analysis](#)

539 Discovery genome-wide association studies were performed in (sub) cohorts of  
540 European descent: TwinsUK (N = 2,739), EPIC-Potsdam (N = 2,192), PainOmics (N =  
541 1,873), SOCCS (controls, N = 459) and SABRE (N = 277) with a combined sample size  
542 of 7,540 (Supplementary Table 1b). Prior to GWAS, the total plasma N-glycome traits  
543 were adjusted for sex and age, and the residuals were quantile transformed to normal  
544 distribution. The genetic association analysis in each cohort was conducted using a  
545 similar protocol. We assumed an additive model of genetic effects. GWAS were based  
546 on the genotypes imputed from Haplotype Reference Consortium Results<sup>76</sup> or 1000  
547 Genomes project<sup>77</sup>. Results of GWAS in each discovery cohort passed a strict quality  
548 control procedure followed by fixed-effects inverse-variance weighted meta-analysis.  
549 After quality control, 8.8 M SNPs were used for the downstream analysis.

550 To define genome-wide significant glyQTLs, we used conventional genome-wide  
551 significance threshold, Bonferroni corrected by 28 independent glycan traits ( $P \leq 1.79 \times$   
552  $10^{-9}$ ) as suggested before<sup>78</sup>. We considered SNPs located in the same locus if they  
553 were located within 250 Kb from the leading SNP (the SNP with lowest  $P$ ). Only the  
554 SNPs and the traits with lowest  $P$  are reported (leading SNP-trait pairs) in the **Table 1**.  
555 The detailed procedure of locus definition is described in Supplementary Note.

556 Replication GWAS were performed using (sub) cohorts of samples with  
557 European descent: SOCCS (colorectal cancer cases, N = 1,283), TwinsUK (N = 1,179),  
558 CEDAR (N = 170); South Asian descent: SABRE (N = 267) and Arabian, Indian, Filipino  
559 descent: QMDiab (N = 325) (Supplementary Table 1b). Results of GWAS in each  
560 discovery cohort passed a strict quality control procedure followed by fixed-effects  
561 inverse-variance weighted meta-analysis. For replication of novel glyQTL, found at the  
562 discovery step, we used the leading SNP-trait pair that showed the most significant  
563 association. The replication threshold was set as  $P < 0.05/28 = 0.00178$ , where 28 is  
564 the number of replicated loci. Moreover, we checked whether the sign of estimated  
565 effect was concordant between discovery and replication studies.

## 566 Identification of secondary associations in glyQTLs

567 To identify secondary association signals at glyQTL in univariate analysis and capture  
568 the overall contribution to phenotypic variation, we performed conditional analysis using  
569 GCTA-COJO software, version 1.93.2beta<sup>45</sup>. This method uses summary-level statistics  
570 from a discovery meta-analysis and LD corrections between SNPs estimated from a  
571 reference sample for implementing a stepwise selection procedure including a series of  
572 conditional and joint regression analyses in which the SNP with the strongest  
573 association in the region is added to the regression model until no additional SNPs  
574 reach genome-wide significance. We used 1,429 unrelated individuals with European  
575 descent from SABRE cohort as reference samples for LD calculation. We used  
576  $P \leq 1.79 \times 10^{-9}$  as a genome-wide significance level and a default window setting to  
577 identify lead associations (Supplementary Table 6a).

## 578 Multi-trait association analysis

579 To gain additional power of glyQTL detection, we performed a multivariate  
580 GWAS of total plasma N-glycome. It has been previously demonstrated that multivariate  
581 genetic association analysis of N-glycome, that is, a joint analysis of multiple N-glycome  
582 traits, has higher power for loci detection than a regression model under which glycome  
583 traits are analyzed independently of each other<sup>28,41</sup>.

584 For discovery and replication analyses, we used discovery and replication  
585 GWAMA summary statistics, obtained in single-trait analysis. The discovery multivariate  
586 analysis was performed using the MANOVA-based method, adopted for analysis of a  
587 group of single-trait GWAS summary statistics (details are in Supplementary Note  
588 Discovery multivariate analysis)<sup>28</sup>. Discovery analysis was performed using the  
589 MultiABEL R package. Due to method requirements, we filtered out SNPs with sample  
590 size lower than 6,790 (which is 90% of 7,540 samples). The statistical significance  
591 threshold for multivariate analysis was set at  $P < 5 \times 10^{-8} / 21$ , where 21 is the number  
592 of multivariate traits described in Supplementary Table 3b and Supplementary Note.  
593 GlyQTLs with significant association were defined in the same way as for single-trait  
594 discovery.

595 For replication of multi-trait associated glyQTLs we used a complex four-step  
596 replication strategy as proposed by Ning et al.<sup>29</sup>, which consists of the following steps:  
597 MANOVA, Phenotype Score, Pearson correlation method and Kendall correlation  
598 method. In the first step (MANOVA) we straightforwardly checked whether the locus is  
599 significantly associated with the multivariate trait in the replication cohort using the same

600 test as in the discovery stage. The replication threshold was set as  $P < \frac{0.05}{(7+16)} = 0.0021$ ,  
601 where 7 is the number of previously identified but not replicated loci and 16 is the  
602 number of novel loci. Then we checked whether the effect direction is consistent  
603 between the two cohorts, using the phenotype score approach<sup>29</sup>. Next, we evaluated  
604 the concordance of multivariate effect between two samples using Pearson and  
605 Kendall's correlation coefficients. We considered an association of the locus replicated if  
606 it had successfully passed MANOVA and phenotype score steps of replication. The  
607 multivariate effect of the locus replicated if it additionally had passed both Pearson's  
608 and Kendall's correlation steps of replication (Supplementary Note, Supplementary  
609 Table 5b, and Supplementary Fig. 2). Phenotype score-based replication was  
610 performed as in Shadrina et al<sup>41</sup>. For each lead pair of SNP and trait group phenotype,  
611 we extracted coefficients of the linear combination of genotype onto multiple atomic  
612 phenotypes, estimated for discovery cohort. We used them to construct the  
613 corresponding trait group phenotypes for further testing of an association between the  
614 lead SNPs and the derived linear combinations (see Supplementary Note for details). A  
615 locus was replicated if the association of the SNP with the constructed linear  
616 combination had the same direction of effect as in the discovery cohort and passed the  
617 threshold of  $P < 0.0021$ .

618 To evaluate the similarity between estimates of multivariate genetic effects from  
619 discovery and replication cohorts across multiple traits, we used an MC-based approach  
620 implemented in MultiABEL package (MV.cor.test() function)<sup>28</sup>. For both Pearson's and  
621 Kendall's correlation coefficients, we considered a multivariate effect for a specific SNP  
622 replicated if the 95% confidence intervals didn't include zero.

### 623 SNP-based heritability and polygenic scores

624 SNP-based heritability was estimated using the LD Score regression software<sup>44</sup>  
625 embedded in the GWAS-MAP platform<sup>79</sup>. We used pre-computed LD scores that were  
626 calculated from the European-ancestry samples in the 1000 Genomes Project. Only the  
627 1,176,189 HapMap3 SNPs were included with a  $MAF \geq 0.05$ . For the purpose of  
628 heritability estimation and further post-GWAS analyses, we generated GWAMA  
629 summary statistics for the samples of European descent with  $N = 10,172$ . We used  
630 GWAMA summary statistics for the analysis in order to use the largest data set with  
631 homogeneous ancestry.

632 SBayesR method reweights the effect of each variant according to the marginal  
633 estimate of its effect size, statistical strength of association, the degree of correlation



634 between the variant and other variants nearby, and tuning parameters. This method  
635 requires a compatible LD matrix file computed using individual-level data from a  
636 reference population. For these analyses, we used publicly available shrunk sparse  
637 GCTB LD matrix including 1.1 million HapMap3 variants and computed from a random  
638 set of 50,000 individuals of European ancestry from the UKB data set<sup>47,80</sup>. SBayesR  
639 (gctb\_2.03) was run for each chromosome separately, and with the default parameters  
640 except for the number of iterations (N = 5,000) and options for the stability of the  
641 algorithm (Supplementary Table 7). The prediction accuracy was defined as the  
642 proportion of the variance of a phenotype that is explained by PGS values (R<sup>2</sup>). To  
643 calculate PGS based on the PGS model, we used PLINK2 software<sup>81</sup>, where PGS  
644 values were calculated as a weighted sum of allele counts. Out-of-sample prediction  
645 accuracy was evaluated using samples from the CEDAR cohort that were not used for  
646 discovery or replication.

#### 647 [Prioritization of candidate genes in found loci](#)

648 For the purpose of post-GWAS analyses, we generated GWAMA summary statistics for  
649 the samples of European descent (N = 10,172). GWAMA summary statistics passed the  
650 same QC procedure as discovery and replication GWAMA. We applied an ensemble of  
651 methods to prioritize plausible candidate genes in the loci with found and replicated  
652 glyQTL (32 in univariate and 8 in multivariate analysis). We applied eight approaches to  
653 prioritize the most likely effector genes: (1) prioritization of the nearest gene; (2)  
654 prioritization of genes with known role in biosynthesis of N-glycans; (3) genes of  
655 congenital disorders of glycosylation; (4) genes with direct experimental support for  
656 regulation of protein N-glycosylation; (5) prioritization of genes containing variants in  
657 strong LD ( $r^2 \geq 0.8$ ) with the lead variant, which are protein truncating variants  
658 (annotated by Variant Effect Predictor, VEP<sup>49</sup>) or predicted to be damaging by FATHMM  
659 XF<sup>50</sup>, FATHMM InDel<sup>51</sup>; (6) prioritization of genes whose eQTL and/or (7) pQTL are  
660 colocalized with glyQTL; (8) prioritization of genes based on the gene set and tissue/cell  
661 type enrichment, calculated by Data-driven Expression Prioritized Integration for  
662 Complex Traits (DEPICT) framework<sup>31</sup>. We prioritized the most likely 'causal gene' for  
663 each association using a consensus-based approach, selecting the gene with the  
664 highest, unweighted sum of evidence across all eight predictors. In the case of equality  
665 of the scores for two genes, we prioritized both genes.

## 666 Functional annotation of genetic variants

667 We inferred the possible molecular consequences of genetic variants in glyQTLs. We  
668 focused on variants in LD with lead (for univariate and multivariate signals) and sentinel  
669 variants (for univariate signals) picked by COJO. We created a “long list” of putative  
670 causal variants using PLINK version 1.9 (--show-tags option), applied to whole genome  
671 re-sequenced data for 503 European ancestry individuals (1000 Genomes phase 3  
672 version 5 data). The size of the window to find the LD in both cases was equal to  
673 500 kb. The default value of  $r^2 > 0.8$  was taken as a threshold to include SNPs into the  
674 credible sets. Ensembl Variant Effect Predictor (VEP) (Supplementary Table 6e) and by  
675 FATHMM-XF (Supplementary Table 6c), FATHMM-INDEL (Supplementary Table 6d) to  
676 reveal pathogenic point mutations.

## 677 Genes of N-glycan biosynthesis and Congenital Disorders of Glycosylation

678 We searched for the genes encoding glycosyltransferases – enzymes, with a known  
679 role in N-glycan biosynthesis<sup>82</sup>, located in the  $\pm 250$  Kb-vicinity of the lead SNPs in  
680 glyQTLs. Additionally, we prioritized genes with known mutations, that cause Congenital  
681 Disorder of Glycosylation according to MedGen database  
682 (<https://www.ncbi.nlm.nih.gov/medgen/76469>) that are located in the vicinity of  $\pm 250$  kb  
683 from the lead SNPs.

## 684 Colocalization with eQTL and pQTL

685 To find potential pleiotropic effects of glyQTL on gene expression levels in relevant  
686 tissues, we applied Summary data-based Mendelian Randomization (SMR) analysis  
687 followed by the Heterogeneity in Dependent Instruments (HEIDI)<sup>32</sup> on expression of  
688 quantitative trait loci (eQTLs) obtained from Westra Blood eQTL collection<sup>83</sup> (peripheral  
689 blood), GTEx (version 7) eQTL collection<sup>84</sup> (liver, whole blood), CEDAR eQTL  
690 collection<sup>53</sup> (CD19+ B lymphocytes, CD8+ T lymphocytes, CD4+ T lymphocytes, CD14+  
691 monocytes, CD15+ granulocytes) and on protein quantitative trait loci (pQTLs) using  
692 SomaLogic datasets<sup>85,86</sup>. As outcome variable we used univariate association results for  
693 the N-glycome trait with the most significant association; in the case of glyQTLs  
694 replicated only in multivariate analysis, we used summary statistics for the most  
695 associated univariate trait as the primary trait in the analysis.

696 The results of the SMR test were considered statistically significant if  $P_{adj} < 0.05$   
697 (Benjamini-Hochberg adjusted  $P$ ). The significance threshold for HEIDI tests was set at  
698  $P = 0.05$  ( $P < 0.05$  corresponds to the rejection of the pleiotropy hypothesis)  
699 (Supplementary Table 6f, 6g).

## 700 DEPICT

701 Gene prioritization and gene set and tissue/cell type enrichment analyses were  
702 performed using the Data-driven Expression Prioritized Integration for Complex Traits  
703 framework (DEPICT)<sup>31</sup>. DEPICT analysis was conducted for SNPs associated with any  
704 N-glycosylation trait at  $P < 5 \times 10^{-8}/28$  in univariate analysis and with any N-  
705 glycosylation trait group at  $P < 5 \times 10^{-8}/21$  in multivariate analysis. The significance  
706 threshold for DEPICT analysis was set at False Discovery Rate  $FDR < 0.20$   
707 (Supplementary Table 6h, 6i, 6j).

## 708 Colocalization with TF and IgG

709 In this study, colocalization analysis (SMR- $\theta$ )<sup>53</sup> was conducted for total plasma,  
710 IgG and TF glyQTLs. The analysis was restricted to loci that were a) previously  
711 implicated in TF GWAS<sup>42</sup> (4 loci); IgG GWAS<sup>40</sup> (15 loci); both (2 loci) (Supplementary  
712 Table 5d), b) reached genome-wide significance in the GWAMA of European descent  
713 (N=10,172), c) replicated in this study. Statistic  $\theta$  is a weighted correlation, whose  
714 computation requires information on p-values and effect direction. The high absolute  
715 value (e. g.  $|\theta| > 0.7$ ) means the locus likely has a pleiotropic effect on investigated  
716 traits.

717

## 718 Pleiotropy with disease

719 To study potential pleiotropic effects on a range of traits associated with various  
720 medical conditions SMR/HEIDI analysis was carried out similarly to that for  
721 colocalization with eQTL and pQTL.

722 Summary statistics for complex and medical conditions-related traits were  
723 obtained from the UK Biobank<sup>87</sup>, the CARDIoGRAM Consortium  
724 (<http://www.cardiogramplusc4d.org/>), the Psychiatric Genomics consortium  
725 (<https://pgc.unc.edu/>) and other trait collections from other studies (see Supplementary  
726 Table 9 for the full list of the traits analyzed). We conducted analysis separately for the  
727 disease-related traits and other complex traits.

728

## 729 Associations between PGS for plasma N-glycosylation traits and disease phenotypes

730 To test the associations between the 117 human plasma N-glycosylation traits  
731 and ICD-10 disease phenotypes, we used logistic regression considering PGS for each  
732 glycan trait as a predictor for each disease phenotype in turn.

733 The list of the diseases was taken from medical histories and questionnaires  
734 obtained from non-related UK Biobank participants of European descent for which we  
735 had PGS for N-glycosylation traits calculated (N = 374,303). All medical codes were  
736 preliminary filtered by prevalence (> 0.5% and < 99.5%). For this analysis we used 167  
737 groups of codes that fall into Chapters I-XV of the UK Biobank classification of  
738 phenotypes. These codes describe a wide range of phenotypes including infectious  
739 diseases, endocrine, nutritional and metabolic diseases, diseases of the nervous  
740 system, diseases of the circulatory, respiratory, digestive and other systems, etc.

741 To perform logistic regression analyses we used the standard glm() function in R  
742 v.4.2.2. programming language. We included sex, age, batch number and first ten  
743 principal components of the kinship matrix (PC 1-10) as covariates in addition to the  
744 PGS predictor. Finally, we filtered out the results not passing the significance threshold  
745 for the association of  $P < 0.05 / (28 \times 167) = 1.07 \times 10^{-5}$ , where 28 is the number of  
746 plasma N-glycome principal components explaining over 99% of the 117 N-  
747 glycosylation traits variation, and 167 is the numbers of ICD-10 codes.

748

#### 749 [Mendelian Randomization and Sensitivity Analyses](#)

750 In the previous step we identified 64 pairs of associated disease phenotypes and  
751 plasma N-glycosylation traits. To investigate the causal relationships between these  
752 traits we performed a bidirectional two-sample MR analysis<sup>33</sup>: for each pair we  
753 performed two MR analyses using the glycosylation trait as exposure and the disease  
754 as outcome and *vice versa*.

755 As the sources of the summary statistics for MR analyses, we used the largest  
756 available GWAMA for plasma N-glycosylation traits in a cohort of European descent  
757 described previously in the current study (N = 10,172) and GWAS available from the UK  
758 Biobank database (for more details about these cohorts see Supplementary Table 14).

759 The framework of the two-sample MR was specified before the analysis. Genetic  
760 IVs for the two sample MR were identified as follows. First, the set of SNPs present both  
761 in the GWAS for the exposure and outcome traits was selected. Then for this  
762 overlapping set of SNPs in the GWAS for the exposure trait we performed clumping for  
763 independence using PLINK2<sup>81</sup> within a 10,000 kb window. Additional parameters for  
764 clumping included an  $r^2 > 0.001$  threshold for correlation, IVs with minor allele  
765 frequency  $MAF < 0.05$  were excluded. When plasma N-glycosylation traits were  
766 considered as exposures,  $P$  threshold for clumping was defined as  $5 \times 10^{-8} / 28 =$

767  $1.79 \times 10^{-9}$  (28 - number of plasma N-glycome principal components explaining over  
768 99% of the 117 N-glycosylation traits variation). When the disease phenotypes were  
769 considered as exposure, this threshold was set at  $5 \times 10^{-8}/14 = 3.57 \times 10^{-9}$  (14 -  
770 number of disease phenotypes significantly associated with at least one plasma N-  
771 glycosylation trait in the logistic regression analysis).

772 Summary statistics for IVs in the exposure and outcome GWAS data were  
773 processed using the TwoSampleMR R package<sup>33</sup>: the data were harmonized excluding  
774 ambiguous/triallelic SNPs. Only the pairs where at least 2 IVs were available for the  
775 exposure trait were considered for the further analysis. MR analysis was performed  
776 using `mr_report()` function from the TwoSampleMR R package. Significance thresholds  
777 for the MR results were set as  $\frac{0.05}{49} = 0.001$  for the analysis of 49 traits pairs where  
778 glycans were considered as exposures, and as  $\frac{0.05}{64} = 0.00078$  for the analysis of the 64  
779 pairs where diseases were considered as exposures. If at least one of the MR methods  
780 used (Inverse variance weighted, MR Egger, Weighted median, Weighted mode, or  
781 Simple mode) produced a statistically significant causal estimate, that pair of traits was  
782 selected for the follow-up sensitivity analyses.

783 Follow-up sensitivity analyses included those automatically implemented in the  
784 `mr_report()` function, such as heterogeneity tests, test for directional horizontal  
785 pleiotropy, leave-one-out analysis, forest plot and funnel plot.

786 In addition to the sensitivity analyses described above, for the pairs where  
787 plasma N-glycosylation traits were used as exposures, since the number of IVs was  
788 very low (2-3 SNPs), we performed colocalization analysis (SMR-HEIDI) for each of the  
789 IVs. The results of the SMR test were considered statistically significant if Benjamini-  
790 Hochberg adjusted  $P < 0.05$ . The significance threshold for HEIDI tests was set at  
791  $P = 0.05$  which corresponds to the rejection of the pleiotropy hypothesis.

792 For the pairs where the disease was the upstream exposure trait (disorders of  
793 lipoprotein metabolism and other lipidaemias, E78) and 27 IVs were available, we  
794 identified pleiotropic IVs using MR-PRESSO R package, detecting the IVs for which  $P$  of  
795 the test for outliers in MR-PRESSO were  $< 1$ . Then we repeated the MR analysis as  
796 described above excluding these SNPs.

### 797 [Data availability](#)

798 The full genome-wide summary association statistics for the 117 N-glycome traits will be  
799 made publicly available **upon publication of the paper**. The data generated in the



800 secondary analyses of this study are included with this article in the Supplementary  
801 Tables.

## 802 [Acknowledgements](#)

803 The work of S.Sh., A.T., D.M., A.S., Y.S.A. was supported by the Research Program at  
804 the Moscow State University (MSU) Institute for Artificial Intelligence. The study was  
805 conducted using the UK Biobank resource under application #59345. The work of E.E.,  
806 Y.A.T was supported by the budget project of the Institute of Cytology and Genetics  
807 FWNR-2022-0020. European Community's Seventh Framework Programme funded  
808 project PainOmics (602736). TwinsUK is funded by the Wellcome Trust, Medical  
809 Research Council, Versus Arthritis, European Union Horizon 2020, Chronic Disease  
810 Research Foundation (CDRF), Zoe Ltd and the National Institute for Health Research  
811 (NIHR) Clinical Research Network (CRN) and Biomedical Research Centre based at  
812 Guy's and St Thomas' NHS Foundation Trust in partnership with King's College  
813 London. The TwinsUK Study was approved by London-Westminster Research Ethics  
814 Committee (REC reference EC04/015), and Guy's and St Thomas' NHS Foundation  
815 Trust Research and Development (R&D). The TwinsUK BioBank was approved by the  
816 HRA - Liverpool East Research Ethics Committee (REC reference 19/NW/0187), IRAS  
817 ID 258513. All participants provide written, informed consent. We thank Toma Keser,  
818 Mirna Šimurina, Marija Vilaj, Jerko Štambuk, Ivan Gudelj, Thomas S. Klarić, Jasminka  
819 Krištić, Jelena Šimunović, Julija Jurić, Ana Momčilović, Najda Rudman, and Maja Hanić  
820 for their assistance with glycan analysis.

821

822

## 823 [Author contributions](#)

824 S.Sh. coordinated this study; S.Sh., A.T., O.Z., D.M., A.S., E.E., E.T., A.N., S.F., N.A.P.,  
825 Y.A.T. contributed to the design of the study, carried out statistical analysis; A.T., D.M.,  
826 A.S., E.T., O.Z., S.Sh. produced the figures; S.Sh., A.T., O.Z., D.M., A.S., Y.A.T.,  
827 contributed to interpretation of the results; S.Sh., A.T., O.Z., D.M., A.S., A.N. and Y.S.A.  
828 wrote the first version of the manuscript; S.Sh., A.T., O.Z., D.M., A.S., and Y.S.A. wrote  
829 the revised second version of the manuscript; S.Sh., E.T., E.E., S.F., V.V. and Y.A.T.  
830 contributed to data harmonization and quality control; F.V., I.T.-A., T.Š. contributed to  
831 plasma N-glycome measurements and quality control; M.M., T.S. analyzed TwinsUK  
832 dataset and contributed to interpretation of the results; M.T., M.D. analyzed SOCCS  
833 dataset and contributed to interpretation of the results; L.K., F.W., D.P., J. Van Z., M.A.

834 designed PainOmics study and contributed to interpretation of the results; K.S. analyzed  
835 QMDiab dataset and contributed to interpretation of the results; M.G. designed CEDAR  
836 study and contributed to interpretation of the results; C.W. and M.B.S. contributed to the  
837 data collection and analyses of EPIC-Potsdam and to the interpretation of results;  
838 Y.S.A. and G.L. conceived and oversaw the study, contributed to the design and  
839 interpretation of the results; all co-authors contributed to the final manuscript revision.

#### 840 [Competing interests statement](#)

841 Y.S.A. is a full-time employee of GSK PLC and receives salary and stock options as  
842 compensation. Y.S.A. is a founder and co-owner of PolyKnomics BV, a private  
843 organization, providing services, research and development in the field of computational  
844 and statistical genomics. G.L. is a founder and owner of Genos Ltd, a biotech company  
845 that specializes in glycan analysis and has several patents in the field. O.Z., T.Š., F.V.  
846 and I.T.-A are employees of Genos Ltd. All other authors declare no conflicts of interest.  
847 Other authors declare no competing financial interests.

#### 848 [References](#)

- 849 1. Apweiler, R., Hermjakob, H. & Sharon, N. On the frequency of protein glycosylation,  
850 as deduced from analysis of the SWISS-PROT database. *Biochim Biophys Acta*  
851 **1473**, 4–8 (1999).
- 852 2. Clerc, F. *et al.* Human plasma protein N-glycosylation. *Glycoconj J* **33**, 309–343  
853 (2016).
- 854 3. Ohtsubo, K. & Marth, J. D. Glycosylation in cellular mechanisms of health and  
855 disease. *Cell* **126**, 855–867 (2006).
- 856 4. Skropeta, D. The effect of individual N-glycans on enzyme activity. *Bioorg Med*  
857 *Chem* **17**, 2645–2653 (2009).
- 858 5. Takeuchi, H. *et al.* O-Glycosylation modulates the stability of epidermal growth  
859 factor-like repeats and thereby regulates Notch trafficking. *J Biol Chem* **292**, 15964–  
860 15973 (2017).
- 861 6. Lauc, G., Pezer, M., Rudan, I. & Campbell, H. Mechanisms of disease: The human  
862 N-glycome. *Biochim Biophys Acta* **1860**, 1574–1582 (2016).

- 863 7. Reily, C., Stewart, T. J., Renfrow, M. B. & Novak, J. Glycosylation in health and  
864 disease. *Nat Rev Nephrol* **15**, 346–366 (2019).
- 865 8. Dotz, V. & Wuhrer, M. N-glycome signatures in human plasma: associations with  
866 physiology and major diseases. *FEBS Lett* **593**, 2966–2976 (2019).
- 867 9. Gudelj, I., Lauc, G. & Pezer, M. Immunoglobulin G glycosylation in aging and  
868 diseases. *Cell Immunol* **333**, 65–79 (2018).
- 869 10. Dwek, R. A., Butters, T. D., Platt, F. M. & Zitzmann, N. Targeting glycosylation as a  
870 therapeutic approach. *Nat Rev Drug Discov* **1**, 65–75 (2002).
- 871 11. Rodríguez, E., Schettters, S. T. T. & van Kooyk, Y. The tumour glyco-code as a  
872 novel immune checkpoint for immunotherapy. *Nat Rev Immunol* **18**, 204–211  
873 (2018).
- 874 12. Pagan, J. D., Kitaoka, M. & Anthony, R. M. Engineered Sialylation of Pathogenic  
875 Antibodies In Vivo Attenuates Autoimmune Disease. *Cell* **172**, 564-577.e13 (2018).
- 876 13. Van Landuyt, L., Lonigro, C., Meuris, L. & Callewaert, N. Customized protein  
877 glycosylation to improve biopharmaceutical function and targeting. *Curr Opin*  
878 *Biotechnol* **60**, 17–28 (2019).
- 879 14. Johannssen, T. & Lepenies, B. Glycan-Based Cell Targeting To Modulate Immune  
880 Responses. *Trends in Biotechnology* **35**, 334–346 (2017).
- 881 15. Paderi, J., Prestwich, G. D., Panitch, A., Boone, T. & Stuart, K. Glycan  
882 Therapeutics: Resurrecting an Almost Pharma-Forgotten Drug Class. *Advanced*  
883 *Therapeutics* **1**, 1800082 (2018).
- 884 16. Adamczyk, B., Tharmalingam, T. & Rudd, P. M. Glycans as cancer biomarkers.  
885 *Biochimica et Biophysica Acta (BBA) - General Subjects* **1820**, 1347–1353 (2012).
- 886 17. Thanabalasingham, G. *et al.* Mutations in HNF1A result in marked alterations of  
887 plasma glycan profile. *Diabetes* **62**, 1329–1337 (2013).

- 888 18. Shinohara, Y., Furukawa, J. & Miura, Y. Glycome as Biomarkers. in *General*  
889 *Methods in Biomarker Research and their Applications* (eds. Preedy, V. R. & Patel,  
890 V. B.) 111–140 (Springer Netherlands, Dordrecht, 2015). doi:10.1007/978-94-007-  
891 7696-8\_23.
- 892 19. Taniguchi, N. *Handbook of Glycosyltransferases and Related Genes, Second*  
893 *Edition // Handbook of Glycosyltransferases and Related Genes*. (2014).
- 894 20. Lauc, G., Vojta, A. & Zoldoš, V. Epigenetic regulation of glycosylation is the  
895 quantum mechanics of biology. *Biochim Biophys Acta* **1840**, 65–70 (2014).
- 896 21. Moremen, K. W., Tiemeyer, M. & Nairn, A. V. Vertebrate protein glycosylation:  
897 diversity, synthesis and function. *Nat. Rev. Mol. Cell Biol.* **13**, 448–462 (2012).
- 898 22. Knezevic, A. *et al.* Variability, heritability and environmental determinants of human  
899 plasma N-glycome. *J. Proteome Res.* **8**, 694–701 (2009).
- 900 23. Lombard, V., Golaconda Ramulu, H., Drula, E., Coutinho, P. M. & Henrissat, B. The  
901 carbohydrate-active enzymes database (CAZy) in 2013. *Nucleic Acids Res* **42**,  
902 D490-495 (2014).
- 903 24. Lauc, G., Rudan, I., Campbell, H. & Rudd, P. M. Complex genetic regulation of  
904 protein glycosylation. *Mol Biosyst* **6**, 329–335 (2010).
- 905 25. Timoshchuk, A., Sharapov, S. & Aulchenko, Y. S. Twelve Years of Genome-Wide  
906 Association Studies of Human Protein N-Glycosylation. *Engineering* (2023)  
907 doi:10.1016/j.eng.2023.03.013.
- 908 26. Krištić, J., Sharapov, S. Z. & Aulchenko, Y. S. Quantitative Genetics of Human  
909 Protein N-Glycosylation. *Adv Exp Med Biol* **1325**, 151–171 (2021).
- 910 27. Reiding, K. R. *et al.* High-throughput Serum N-Glycomics: Method Comparison and  
911 Application to Study Rheumatoid Arthritis and Pregnancy-associated Changes. *Mol.*  
912 *Cell. Proteomics* **18**, 3–15 (2019).

- 913 28. Shen, X. *et al.* Multivariate discovery and replication of five novel loci associated  
914 with Immunoglobulin G N-glycosylation. *Nat Commun* **8**, 447 (2017).
- 915 29. Ning, Z. *et al.* Nontrivial Replication of Loci Detected by Multi-Trait Methods. *Front*  
916 *Genet* **12**, 627989 (2021).
- 917 30. Pasaniuc, B. & Price, A. L. Dissecting the genetics of complex traits using summary  
918 association statistics. *Nat. Rev. Genet.* **18**, 117–127 (2017).
- 919 31. Pers, T. H. *et al.* Biological interpretation of genome-wide association studies using  
920 predicted gene functions. *Nat Commun* **6**, 5890 (2015).
- 921 32. Zhu, Z. *et al.* Integration of summary data from GWAS and eQTL studies predicts  
922 complex trait gene targets. *Nat. Genet.* **48**, 481–487 (2016).
- 923 33. Hemani, G. *et al.* The MR-Base platform supports systematic causal inference  
924 across the human phenome. *Elife* **7**, (2018).
- 925 34. Lauc, G. *et al.* Genomics Meets Glycomics—The First GWAS Study of Human N-  
926 Glycome Identifies HNF1 $\alpha$  as a Master Regulator of Plasma Protein Fucosylation.  
927 *PLoS genetics* (2010) doi:10.1371/journal.pgen.1001256.
- 928 35. Huffman, J. E. *et al.* Polymorphisms in B3GAT1, SLC9A9 and MGAT5 are  
929 associated with variation within the human plasma N-glycome of 3533 European  
930 adults. *Hum Mol Genet* **20**, 5000–5011 (2011).
- 931 36. Sharapov, S. *et al.* *Defining the Genetic Control of Human Blood Plasma N-*  
932 *Glycome Using Genome-Wide Association Study.* (2018). doi:10.1101/365486.
- 933 37. Sharapov, S. Z. *et al.* Replication of 15 loci involved in human plasma protein N-  
934 glycosylation in 4802 samples from four cohorts. *Glycobiology* **31**, 82–88 (2021).
- 935 38. Lauc, G. *et al.* Loci associated with N-glycosylation of human immunoglobulin G  
936 show pleiotropy with autoimmune diseases and haematological cancers. *PLoS*  
937 *Genet.* **9**, e1003225 (2013).

- 938 39. Wahl, A. *et al.* Genome-Wide Association Study on Immunoglobulin G Glycosylation  
939 Patterns. *Front. Immunol.* **9**, 277 (2018).
- 940 40. Klarić, L. *et al.* Glycosylation of immunoglobulin G is regulated by a large network of  
941 genes pleiotropic with inflammatory diseases. *Sci Adv* **6**, eaax0301 (2020).
- 942 41. Shadrina, A. S. *et al.* Multivariate genome-wide analysis of immunoglobulin G N-  
943 glycosylation identifies new loci pleiotropic with immune function. *Hum Mol Genet*  
944 **30**, 1259–1270 (2021).
- 945 42. Landini, A. *et al.* Genetic regulation of post-translational modification of two distinct  
946 proteins. *Nat. Commun.* **13**, 1586 (2022).
- 947 43. Zaytseva, O. O. *et al.* Investigation of the causal relationships between human IgG  
948 N-glycosylation and 12 common diseases associated with changes in the IgG N-  
949 glycome. *Hum Mol Genet* **31**, 1545–1559 (2022).
- 950 44. Bulik-Sullivan, B. K. *et al.* LD Score regression distinguishes confounding from  
951 polygenicity in genome-wide association studies. *Nat Genet* **47**, 291–295 (2015).
- 952 45. Yang, J. *et al.* Conditional and joint multiple-SNP analysis of GWAS summary  
953 statistics identifies additional variants influencing complex traits. *Nat. Genet.* **44**,  
954 369–75, S1-3 (2012).
- 955 46. Zaytseva, O. O. *et al.* Heritability of Human Plasma N-Glycome. *J Proteome Res* **19**,  
956 85–91 (2020).
- 957 47. Lloyd-Jones, L. R. *et al.* Improved polygenic prediction by Bayesian multiple  
958 regression on summary statistics. *Nat Commun* **10**, 5086 (2019).
- 959 48. Aragam, K. G. *et al.* Discovery and systematic characterization of risk variants and  
960 genes for coronary artery disease in over a million participants. *Nat Genet* **54**, 1803–  
961 1815 (2022).
- 962 49. McLaren, W. *et al.* The Ensembl Variant Effect Predictor. *Genome Biol* **17**, 122  
963 (2016).



- 964 50. Rogers, M. *et al.* FATHMM-XF: accurate prediction of pathogenic point mutations  
965 via extended features. *Bioinform.* (2018) doi:10.1093/bioinformatics/btx536.
- 966 51. Ferlaino, M. *et al.* An integrative approach to predicting the functional effects of  
967 small indels in non-coding regions of the human genome. *BMC Bioinformatics* **18**,  
968 442 (2017).
- 969 52. Stacey, D. *et al.* ProGeM: a framework for the prioritization of candidate causal  
970 genes at molecular quantitative trait loci. *Nucleic Acids Res* **47**, e3 (2019).
- 971 53. Momozawa, Y. *et al.* IBD risk loci are enriched in multigenic regulatory modules  
972 encompassing putative causative genes. *Nature Communications* **9**, (2018).
- 973 54. Giambartolomei, C. *et al.* Bayesian test for colocalisation between pairs of genetic  
974 association studies using summary statistics. *PLoS Genet* **10**, e1004383 (2014).
- 975 55. Williams, F. M. K. *et al.* Ischemic stroke is associated with the ABO locus: the  
976 EuroCLOT study. *Ann Neurol* **73**, 16–31 (2013).
- 977 56. Sabotta, C. M. *et al.* Genetic variants associated with circulating liver injury markers  
978 in Mexican Americans, a population at risk for non-alcoholic fatty liver disease. *Front*  
979 *Genet* **13**, 995488 (2022).
- 980 57. Ewald, D. R. & Sumner, S. C. J. Blood type biochemistry and human disease. *Wiley*  
981 *Interdiscip Rev Syst Biol Med* **8**, 517–535 (2016).
- 982 58. Verbanck, M., Chen, C.-Y., Neale, B. & Do, R. Detection of widespread horizontal  
983 pleiotropy in causal relationships inferred from Mendelian randomization between  
984 complex traits and diseases. *Nat Genet* **50**, 693–698 (2018).
- 985 59. Fairfield, C. J. *et al.* Genome-Wide Association Study of NAFLD Using Electronic  
986 Health Records. *Hepatology Communications* **6**, 297 (2022).
- 987 60. Vujkovic, M. *et al.* A multiancestry genome-wide association study of unexplained  
988 chronic ALT elevation as a proxy for nonalcoholic fatty liver disease with histological  
989 and radiological validation. *Nat Genet* **54**, 761–771 (2022).

- 990 61. Hülsmeyer, A. J., Tobler, M., Burda, P. & Hennet, T. Glycosylation site occupancy in  
991 health, congenital disorder of glycosylation and fatty liver disease. *Sci Rep* **6**, 33927  
992 (2016).
- 993 62. Verhelst, X. *et al.* Protein Glycosylation as a Diagnostic and Prognostic Marker of  
994 Chronic Inflammatory Gastrointestinal and Liver Diseases. *Gastroenterology* **158**,  
995 95–110 (2020).
- 996 63. Blomme, B., Van Steenkiste, C., Callewaert, N. & Van Vlierberghe, H. Alteration of  
997 protein glycosylation in liver diseases. *Journal of Hepatology* **50**, 592–603 (2009).
- 998 64. Gong, J., Tu, W., Liu, J. & Tian, D. Hepatocytes: A key role in liver inflammation.  
999 *Front. Immunol.* **13**, (2023).
- 1000 65. Radovani, B. & Gudelj, I. N-Glycosylation and Inflammation; the Not-So-Sweet  
1001 Relation. *Front Immunol* **13**, 893365 (2022).
- 1002 66. Kettunen, J. *et al.* Genome-wide study for circulating metabolites identifies 62 loci  
1003 and reveals novel systemic effects of LPA. *Nat Commun* **7**, 11122 (2016).
- 1004 67. Kiryluk, K., Novak, J. & Gharavi, A. G. Pathogenesis of Immunoglobulin A  
1005 Nephropathy: Recent Insight from Genetic Studies. *Annual Review of Medicine* **64**,  
1006 339–356 (2013).
- 1007 68. Kiss, M. G. *et al.* Complement Factor H Modulates Splenic B Cell Development and  
1008 Limits Autoantibody Production. *Front Immunol* **10**, 1607 (2019).
- 1009 69. Dotz, V. *et al.* O- and N-Glycosylation of Serum Immunoglobulin A is Associated  
1010 with IgA Nephropathy and Glomerular Function. *J Am Soc Nephrol* **32**, 2455–2465  
1011 (2021).
- 1012 70. Momčilović, A. *et al.* Simultaneous Immunoglobulin A and G Glycopeptide Profiling  
1013 for High-Throughput Applications. *Anal Chem* **92**, 4518–4526 (2020).
- 1014 71. Demus, D. *et al.* Large-Scale Analysis of Apolipoprotein CIII Glycosylation by  
1015 Ultrahigh Resolution Mass Spectrometry. *Frontiers in Chemistry* **9**, (2021).

- 1016 72. Avila Cobos, F., Alquicira-Hernandez, J., Powell, J. E., Mestdagh, P. & De Preter, K.  
1017 Benchmarking of cell type deconvolution pipelines for transcriptomics data. *Nat*  
1018 *Commun* **11**, 5650 (2020).
- 1019 73. Akmačić, I. T. *et al.* High-throughput glycomics: optimization of sample preparation.  
1020 *Biochemistry (Mosc.)* **80**, 934–942 (2015).
- 1021 74. Dieterle, F., Ross, A., Schlotterbeck, G. & Senn, H. Probabilistic quotient  
1022 normalization as robust method to account for dilution of complex biological  
1023 mixtures. Application in 1H NMR metabonomics. *Anal Chem* **78**, 4281–4290 (2006).
- 1024 75. Benedetti, E. *et al.* Systematic Evaluation of Normalization Methods for Glycomics  
1025 Data Based on Performance of Network Inference. *Metabolites* **10**, 271 (2020).
- 1026 76. McCarthy, S. *et al.* A reference panel of 64,976 haplotypes for genotype imputation.  
1027 *Nat Genet* **48**, 1279–1283 (2016).
- 1028 77. 1000 Genomes Project Consortium *et al.* A global reference for human genetic  
1029 variation. *Nature* **526**, 68–74 (2015).
- 1030 78. Li, J. & Ji, L. Adjusting multiple testing in multilocus analyses using the eigenvalues  
1031 of a correlation matrix. *Heredity (Edinb)* **95**, 221–227 (2005).
- 1032 79. Shashkova, T. I. *et al.* The GWAS-MAP platform for aggregation of results of  
1033 genome-wide association studies and the GWAS-MAP|homo database of 70 billion  
1034 genetic associations of human traits. *Vavilovskii Zhurnal Genet Selektiv* **24**, 876–  
1035 884 (2020).
- 1036 80. Bycroft, C. *et al.* The UK Biobank resource with deep phenotyping and genomic  
1037 data. *Nature* **562**, 203–209 (2018).
- 1038 81. Chen, Z.-L. *et al.* A high-speed search engine pLink 2 with systematic evaluation for  
1039 proteome-scale identification of cross-linked peptides. *Nat Commun* **10**, 3404  
1040 (2019).

- 1041 82. Narimatsu, Y. *et al.* An Atlas of Human Glycosylation Pathways Enables Display of  
1042 the Human Glycome by Gene Engineered Cells. *Mol Cell* **75**, 394-407.e5 (2019).
- 1043 83. Westra, H.-J. *et al.* Systematic identification of trans eQTLs as putative drivers of  
1044 known disease associations. *Nat. Genet.* **45**, 1238–1243 (2013).
- 1045 84. GTEx Consortium *et al.* Genetic effects on gene expression across human tissues.  
1046 *Nature* **550**, 204–213 (2017).
- 1047 85. Suhre, K. *et al.* Connecting genetic risk to disease end points through the human  
1048 blood plasma proteome. *Nat Commun* **8**, 14357 (2017).
- 1049 86. Sun, B. B. *et al.* Genomic atlas of the human plasma proteome. *Nature* **558**, 73–79  
1050 (2018).
- 1051 87. Canela-Xandri, O., Rawlik, K. & Tenesa, A. An atlas of genetic associations in UK  
1052 Biobank. *Nat Genet* **50**, 1593–1599 (2018).
- 1053 88. Lachmann, A. *et al.* Massive mining of publicly available RNA-seq data from human  
1054 and mouse. *Nat Commun* **9**, 1366 (2018).

1055

## 1056 **Legends to Main Figures**

1057 **Figure 1: Discovered loci.** (a) Associations of 59 loci with 138 glycomic traits labeled  
1058 by the prioritized candidate or nearest gene names. Marked black: loci are discovered  
1059 and replicated in this work; red: discovered, but not replicated in this work. In total, 117  
1060 univariate traits were analyzed (Supplementary Table 3a), but for two of them, no  
1061 genome-wide significant associations were found. Univariate traits are grouped into 4  
1062 categories: glycans mostly linked to immunoglobulins (green), glycans mostly linked to  
1063 non-immunoglobulin proteins (purple), glycans linked to both types of proteins (orange),  
1064 not classified glycans (gray). The details of glycan classification are described in  
1065 Supplementary Note. Also, the results from analysis of 21 multivariate traits (turquoise)  
1066 are presented. The multivariate traits were defined based on biochemical similarities  
1067 between 36 directly measured total plasma N-glycan traits (Supplementary Table 3b).

1068 (b) A network view of associations between loci and glycan traits. Rectangular nodes  
1069 represent genetic loci labeled with the names of the prioritized candidate or nearest

1070 genes; circle nodes represent glycan traits. Lines represent significant genetic  
1071 associations between locus and specific glycans. The colors of circle nodes are  
1072 consistent with those in (a).

1073 Symbol ○ next to the candidate gene indicates that the locus was previously discovered  
1074 in immunoglobulin G N-glycome GWASs; Symbol ● — the locus was previously  
1075 discovered in transferrin N-glycome GWAS, as reviewed in <sup>25</sup>.

1076

1077 **Figure 2: Candidate genes.** (a) Gene expression of the candidate genes in two  
1078 relevant cell types - hepatocytes and plasma cells. Expression levels are represented  
1079 as the median logarithm of transcripts per million. The data for hepatocytes (N = 513)  
1080 and plasma cells (N = 53) samples were obtained from the ARCHS4 portal <sup>88</sup>.

1081 (b) Predictors indicating the 32 candidate genes. Gene order corresponds to (a). The  
1082 identical superscripts denote candidate genes inside one locus. Full details of the gene  
1083 prioritization are presented in Supplementary Table 6b. Symbol ○ next to the candidate  
1084 gene indicates that the locus was previously discovered in immunoglobulin G N-  
1085 Glycome GWASs; Symbol ● — the locus was previously discovered in transferrin N-  
1086 Glycome GWAS, as reviewed in <sup>25</sup>.

1087

1088 **Figure 3: Phenome-wide colocalization results for significant and replicated loci.**

1089 (a) Heatmap of traits with pleiotropic associations ( $P_{adjSMR} < 0.05$  and  $P_{HEIDI} \geq$   
1090  $0.05$ ). The row order is determined by clustering on the set of significantly colocalized  
1091 traits (Jaccard similarity index and Ward's linkage). For the sake of readability similar  
1092 traits are grouped into broader categories, e.g., such traits as fat-free mass of left leg,  
1093 trunk fat mass are combined under the name "Body mass". The numbers in the cells  
1094 represent the number of pleiotropic associations, grouped under a common name,  
1095 confirmed for a given locus. Color does not carry semantic load.

1096 (b) Heatmap providing details of pleiotropic associations with diseases from (a). Color  
1097 does not carry semantic load.

1098 (c) Count of traits for each locus with pleiotropic associations.

1099 Symbol ○ next to the candidate gene indicates that the locus was previously discovered  
1100 in immunoglobulin G N-Glycome GWASs; Symbol ● — the locus was previously  
1101 discovered in transferrin N-Glycome GWAS, as reviewed in <sup>25</sup>. Abbreviations: BMI: body  
1102 mass index; BN: benign neoplasm; CLL: chronic leukocytic leukemia; T1D: type 1  
1103 diabetes; T2D: type 2 diabetes; BD: bipolar disorder; BP: blood pressure; MI:  
1104 myocardial infarction; CAD: coronary artery's disease; CD: Crohn disease; IBD:

1105 Inflammatory bowel disease; IHD: Ischemic heart disease; NC: non-cancer, non-I: non-  
 1106 iodine dependent; RA: rheumatoid arthritis; SCZ: schizophrenia; UC: ulcerative colitis.  
 1107

1108 **Figure 4: Significant associations between PGS for plasma N-glycosylation traits**  
 1109 **and ICD-10 diseases.**

1110 Heatmap of associations between PGS for plasma N-glycosylation traits and ICD-10  
 1111 diseases that were statistically significant at the designated significance threshold of  
 1112  $1.07 \times 10^{-5}$ . Every column represents an N-glycosylation trait, every row – an ICD-10  
 1113 disease. The colour of the cell represents the effects estimated in the logistic regression  
 1114 of the disease phenotype incidence on the PGS for each glycan trait – blue hues  
 1115 represent negative effects, red hues – positive, and the intensity of the colour  
 1116 represents the absolute value of the effect (larger values are shown in darker hues).  
 1117 Grey cells represent the non-significant associations. The bands under the heatmap  
 1118 depict the groups of N-glycosylation traits that are related to certain structural features  
 1119 of the N-glycans. T1D – type 1 diabetes.  
 1120

1121 **Table 1: Twenty-five novel loci associated with total plasma N-glycosylation**  
 1122 **discovered and replicated in this study.** Full results of discovery and replication are  
 1123 provided in Supplementary Table 5a, 5b. CHR:POS—chromosome and position of SNP  
 1124 according to GRCh37 human genome build; EA/RA—effective and reference allele;  
 1125 Gene—prioritized or nearest gene for a locus (Supplementary Table 6b); N—sample  
 1126 size; EAF—effective allele frequency; BETA (SE)—effect (in SD units) and standard  
 1127 error of effect; *P*—P-value; Top trait—glycan trait with the strongest association (the  
 1128 lowest *P*); Type of association—univariate or multivariate. Description of glycan traits is  
 1129 provided in Supplementary Table 3. Symbol ○ — the locus was previously discovered in  
 1130 immunoglobulin G N-glycome GWASs, as reviewed in <sup>25</sup>.  
 1131

| SNP info   |             |       |         | Discovery |        |                |          |                                   |                     |
|------------|-------------|-------|---------|-----------|--------|----------------|----------|-----------------------------------|---------------------|
| SNP        | CHR:POS     | EA/RA | Gene    | N         | EAF    | BETA (SE)      | <i>P</i> | Top trait                         | Type of association |
| rs12726286 | 1:93334379  | C/T   | DIPK1A  | 7540      | 73.52% | 0.022 (0.002)  | 2.24E-21 | sialylation of antennary branches | multivariate        |
| rs1329427  | 1:196704559 | C/T   | CFH     | 7540      | 57.63% | 0.016 (0.003)  | 5.61E-10 | N-glycosylation                   | multivariate        |
| rs1260326  | 2:27730940  | C/T   | GCKR    | 7081      | 57.51% | -0.168 (0.018) | 9.65E-22 | G3total                           | univariate          |
| rs2470750  | 3:98690592  | A/T   | ST3GAL6 | 6790      | 59.04% | 0.012 (0.002)  | 7.23E-10 | high branching glycans            | multivariate        |
| rs3774964  | 4:103519487 | A/G   | SLC39A8 | 7164      | 63.69% | 0.109 (0.018)  | 1.49E-09 | G0n                               | univariate          |
| rs7705720  | 5:95280033  | C/T   | ELL2 ○  | 7540      | 20.03% | -0.133 (0.021) | 1.32E-10 | FG1S1/(FG1+FG1S1)                 | univariate          |
| rs4543384  | 6:139629524 | C/T   | TXLNB ○ | 6790      | 55.74% | 0.143 (0.018)  | 9.67E-16 | FA2BG1n                           | univariate          |



|            |              |     |                |      |        |                |          |                                          |              |
|------------|--------------|-----|----------------|------|--------|----------------|----------|------------------------------------------|--------------|
| rs7758383  | 6:143169723  | A/G | HIVEP2 ◊       | 7540 | 49.87% | 0.153 (0.017)  | 3.55E-20 | FA2G2n                                   | univariate   |
| rs34166762 | 7:73018524   | C/T | MLXIPL         | 7540 | 27.58% | -0.121 (0.019) | 1.09E-10 | A3G3S2                                   | univariate   |
| rs7781265  | 7:150950940  | A/G | SMARCD3 ◊      | 7540 | 10.99% | 0.223 (0.027)  | 4.75E-16 | M64                                      | univariate   |
| rs4841133  | 8:9183664    | A/G | LOC157273      | 7540 | 8.37%  | 0.013 (0.002)  | 6.85E-10 | sialylation of antennary branches        | multivariate |
| rs28601761 | 8:126500031  | C/G | TRIB1          | 6790 | 57.56% | -0.143 (0.018) | 7.10E-15 | G3Fa/G3total                             | univariate   |
| rs582118   | 9:136145471  | A/G | ABO            | 7540 | 65.12% | 0.023 (0.003)  | 2.00E-17 | N-glycosylation                          | multivariate |
| rs174528   | 11:61543499  | C/T | FADS2          | 7540 | 35.83% | 0.013 (0.002)  | 1.50E-09 | sialylation of antennary branches        | multivariate |
| rs36020612 | 11:123344435 | C/T | GRAMD1B        | 7319 | 79.96% | -0.169 (0.022) | 1.66E-14 | FBG2S1/<br>(FBG2+FBG2S1+FBG2S2)          | univariate   |
| rs11223982 | 11:134612702 | A/G | LINC02714      | 6280 | 12.47% | 0.256 (0.029)  | 3.45E-19 | A4G4S3                                   | univariate   |
| rs7161378  | 14:65450780  | C/T | MAX            | 7540 | 24.74% | -0.180 (0.019) | 2.05E-20 | FG3/G3total                              | univariate   |
| rs28929474 | 14:94844947  | C/T | SERPINA1       | 5135 | 97.71% | 0.437 (0.072)  | 1.01E-09 | A2G2S2                                   | univariate   |
| rs8046823  | 16:71400131  | A/G | CALB2          | 7540 | 51.53% | 0.021 (0.003)  | 1.46E-16 | galactosylation of antennary<br>branches | multivariate |
| rs217184   | 16:72105965  | C/T | HP             | 7540 | 19.90% | 0.211 (0.021)  | 5.44E-23 | S3total                                  | univariate   |
| rs4500785  | 17:16848565  | C/G | TNFRSF13B ◊    | 7540 | 88.63% | -0.180 (0.027) | 1.33E-11 | FA2BG1                                   | univariate   |
| rs2659007  | 17:79217478  | A/G | SLC38A10 ◊     | 7540 | 46.44% | 0.108 (0.017)  | 4.07E-10 | FA2BG1n                                  | univariate   |
| rs11669860 | 19:19277296  | A/G | MEF2B ◊        | 7540 | 55.43% | -0.113 (0.017) | 7.14E-11 | FA2BG1n                                  | univariate   |
| rs2618588  | 20:17832658  | C/T | LOC107985440 ◊ | 7540 | 39.69% | 0.011 (0.002)  | 2.02E-10 | core-fucosylation                        | multivariate |
| rs2834847  | 21:36588180  | A/C | RUNX1 ◊        | 7540 | 77.22% | 0.160 (0.020)  | 2.58E-15 | FBn                                      | univariate   |

1132

1133

1134

1135

1136 **Table 2: Causal associations between plasma N-glycosylation traits and ICD-10**

1137 **diseases discovered in this study.** Full results of the analysis are provided in

1138 Supplementary Tables 10a, 10b. Exposure – upstream trait in the analysis (cause);

1139 Outcome – downstream trait in the analysis; IV- instrumental variable (independent

1140 SNPs associated with upstream trait); MR – Mendelian randomization; Causal BETA

1141 (SE) – causal effect of the exposure on the outcome (in log OR units of the disease unit

1142 per SD units of glycan trait if glycan trait was an exposure, or in SD units of glycan trait

1143 per log OR unit of the disease phenotype if disease phenotype was an exposure) with

1144 its standard error; *P* - P-value of the MR analysis.

1145

| Exposure                                                           | Outcome                                                         | MR method                 | Number of IVs | Causal BETA (SE) | <i>P</i> |
|--------------------------------------------------------------------|-----------------------------------------------------------------|---------------------------|---------------|------------------|----------|
| PGP64 - The percentage of M6 in total neutral plasma glycans (GPn) | J45 - Asthma                                                    | Weighted median           | 3             | 0.012 (0,0036)   | 9.78E-04 |
| PGP69 - The percentage of M9 in total neutral plasma glycans (GPn) | E78 - Disorders of lipoprotein metabolism and other lipidaemias | Inverse variance weighted | 2             | 0.013 (0,0035)   | 1.25E-04 |
| E78 - Disorders of lipoprotein metabolism and other lipidaemias    | PGP18 - The percentage of M9                                    | Inverse variance weighted | 27            | 4.09 (1,1772)    | 5.16E-04 |

|                                                                 |                                                                            |                 |    |               |          |
|-----------------------------------------------------------------|----------------------------------------------------------------------------|-----------------|----|---------------|----------|
| E78 - Disorders of lipoprotein metabolism and other lipidaemias | PGP107 - The percentage of high-mannose structures in total plasma glycans | Weighted median | 27 | 3.01 (0,8756) | 5.87E-04 |
|-----------------------------------------------------------------|----------------------------------------------------------------------------|-----------------|----|---------------|----------|

1146



a.

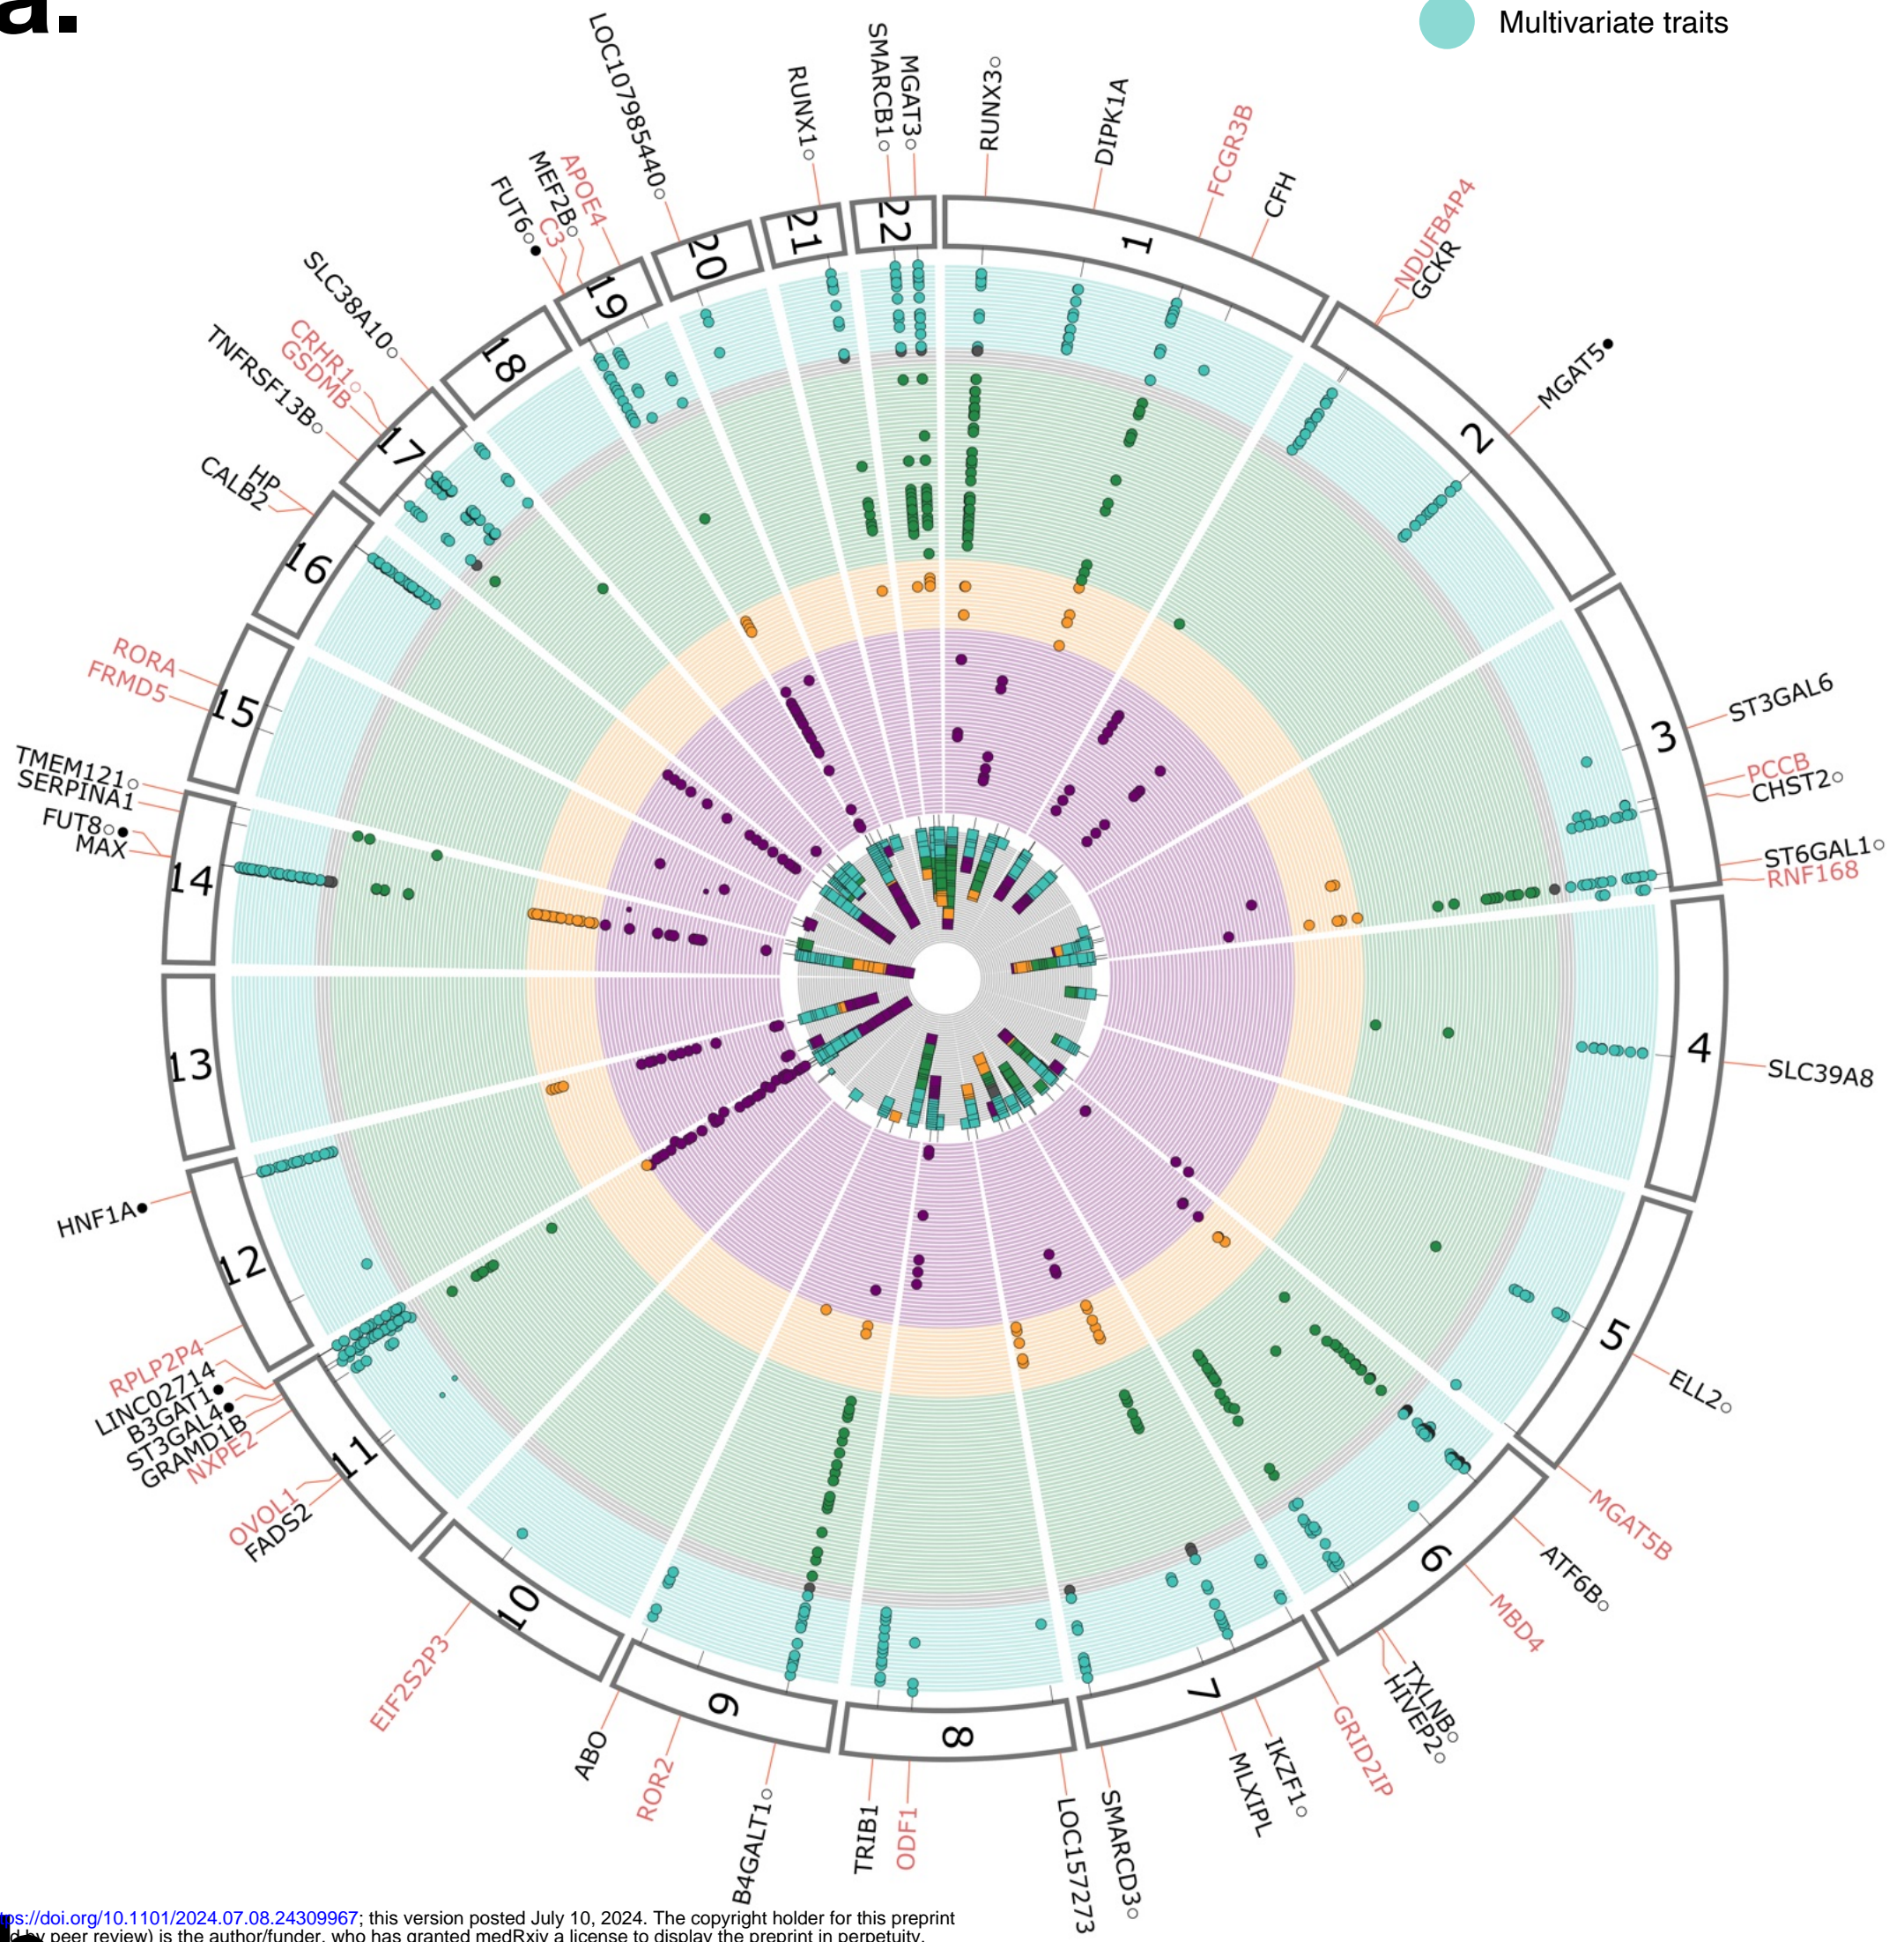

medRxiv preprint doi: <https://doi.org/10.1101/2024.07.08.24309967>; this version posted July 10, 2024. The copyright holder for this preprint (which was not certified by peer review) is the author/funder, who has granted medRxiv a license to display the preprint in perpetuity. All rights reserved. No reuse allowed without permission.

b.

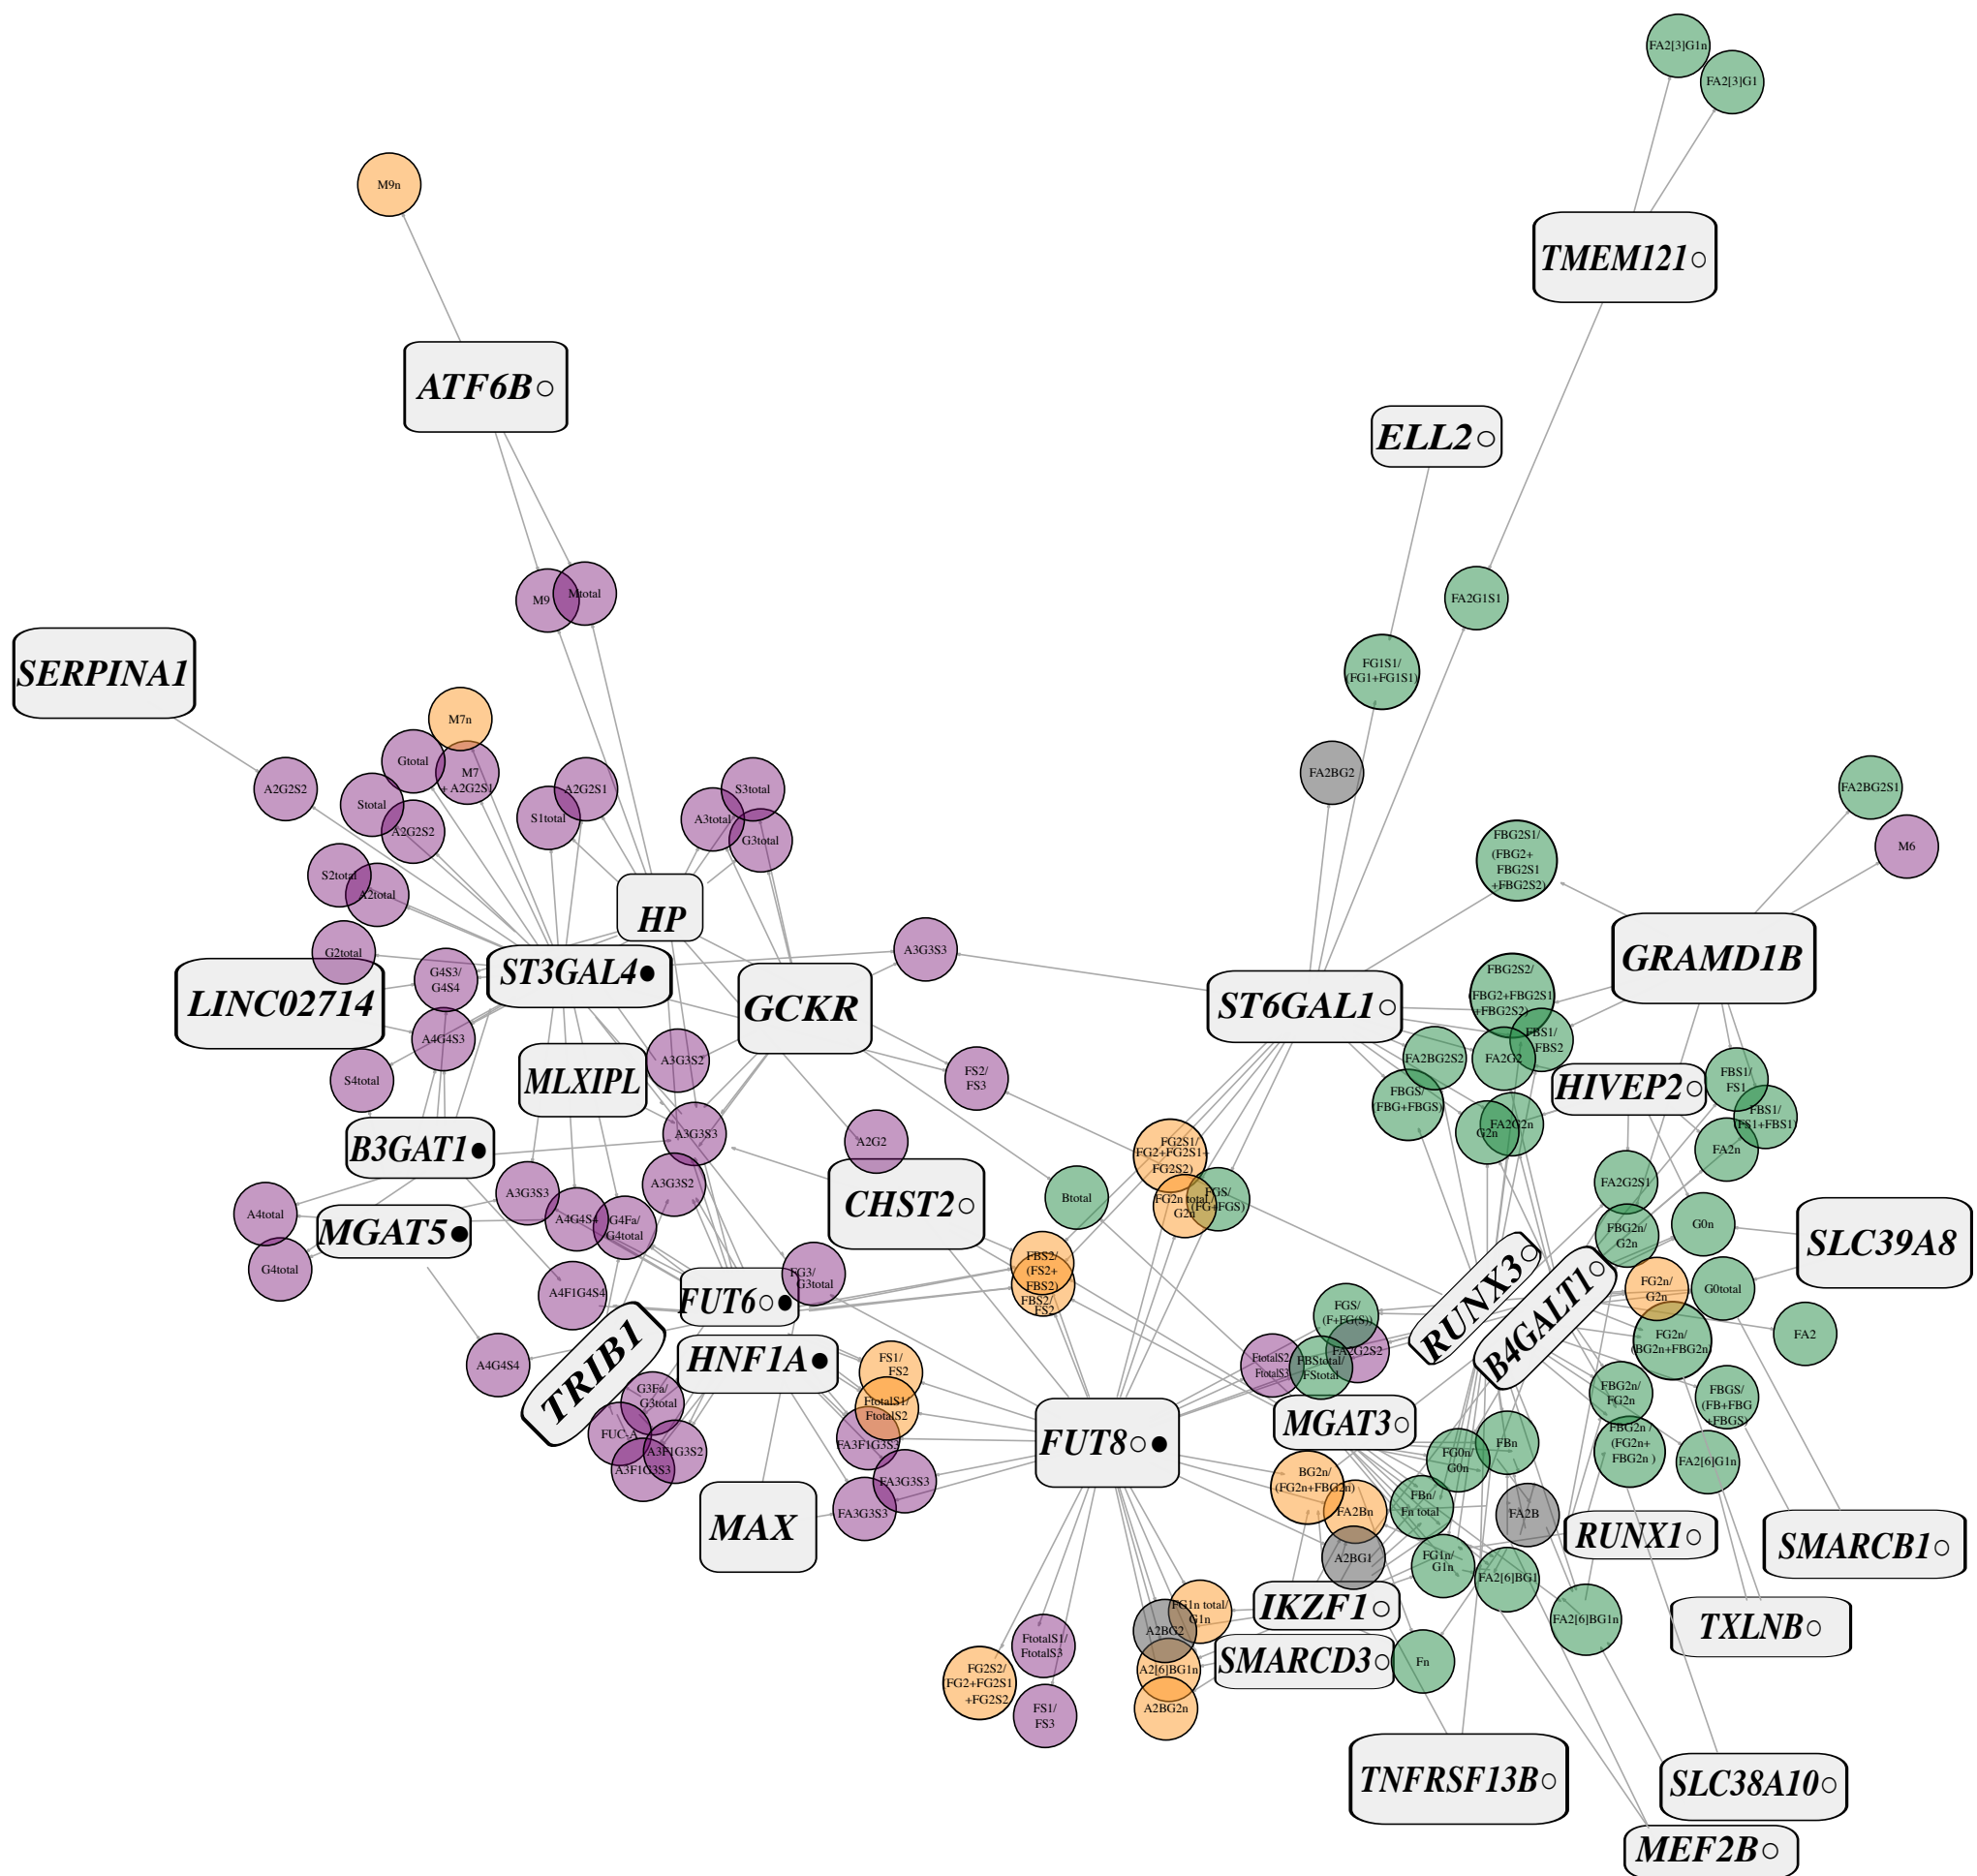



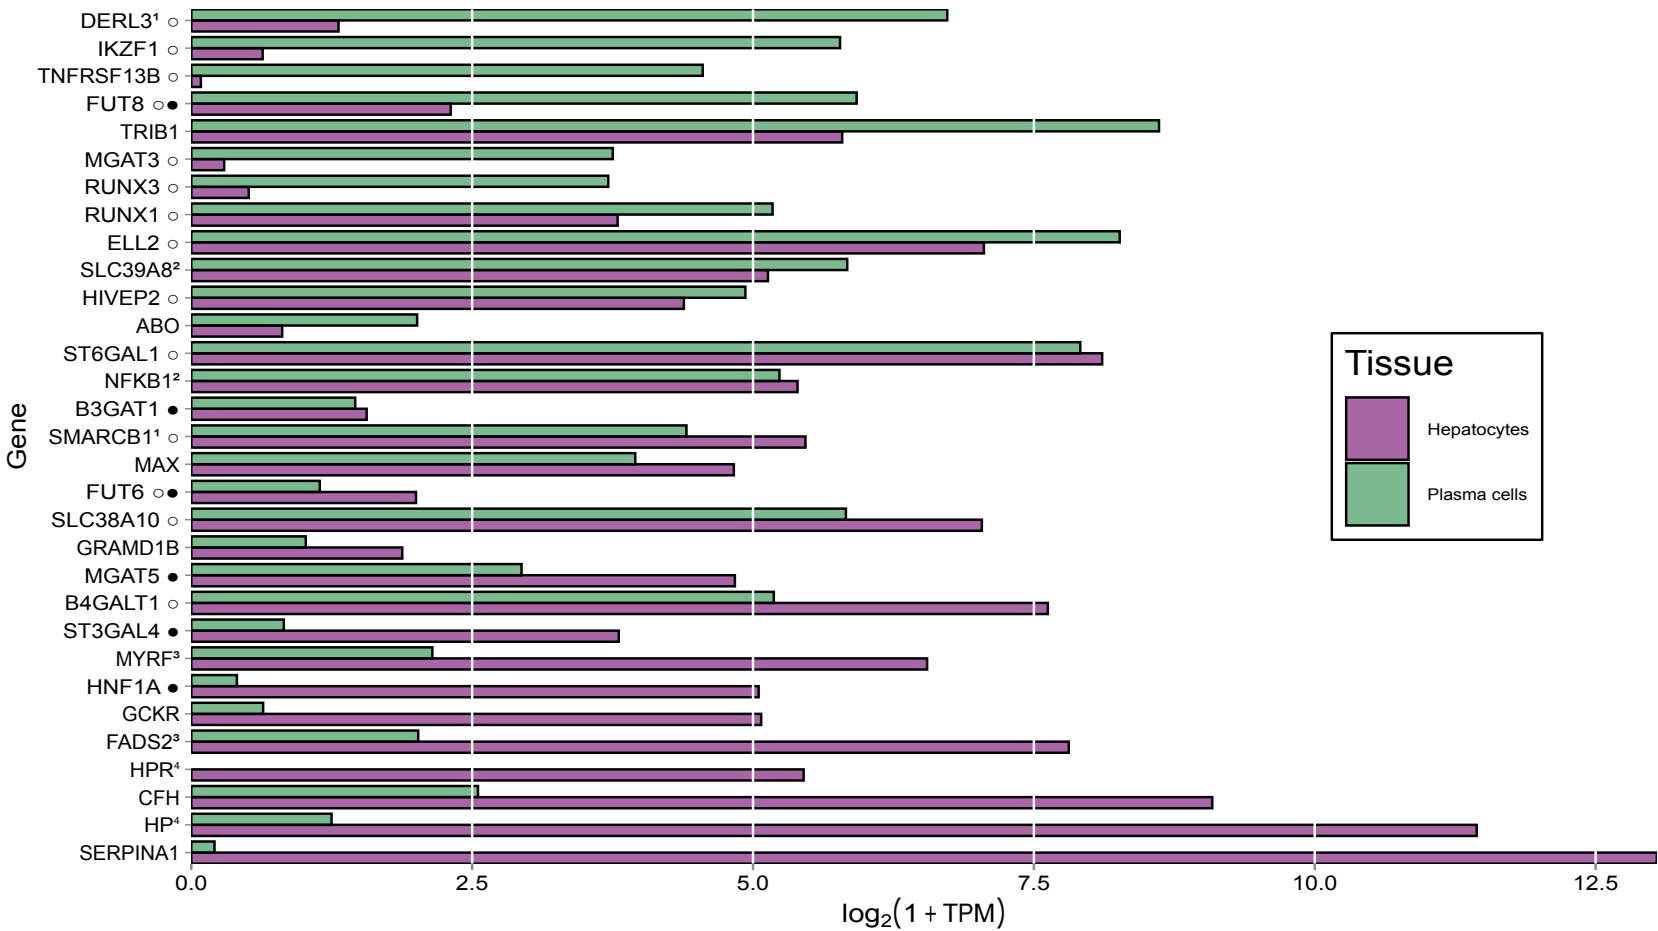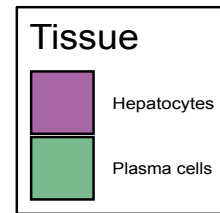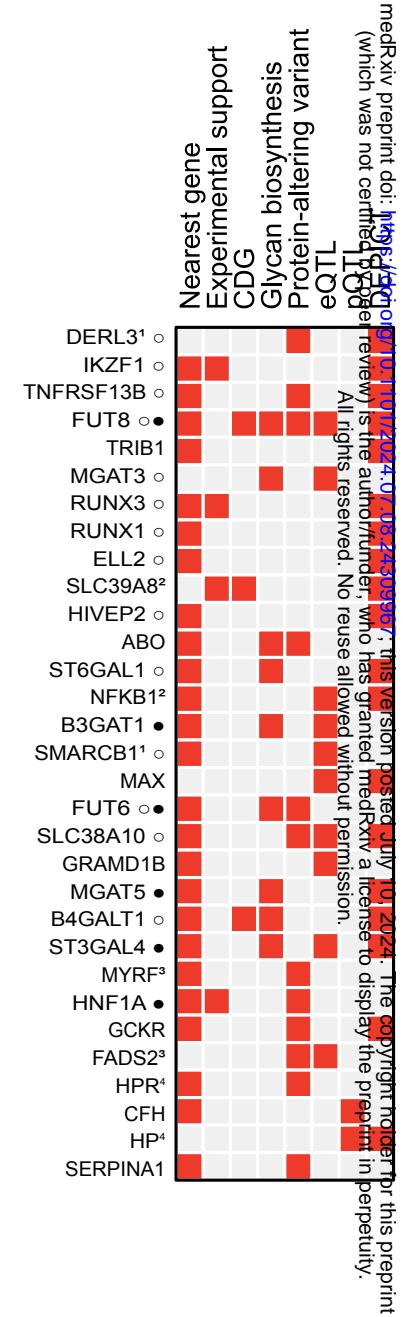

medRxiv preprint doi: <https://doi.org/10.1101/2024.07.10.24309997>; this version posted July 10, 2024. The copyright holder for this preprint (which was not certified by peer review) is the author/funder, who has granted medRxiv a license to display the preprint in perpetuity. All rights reserved. No reuse allowed without permission.

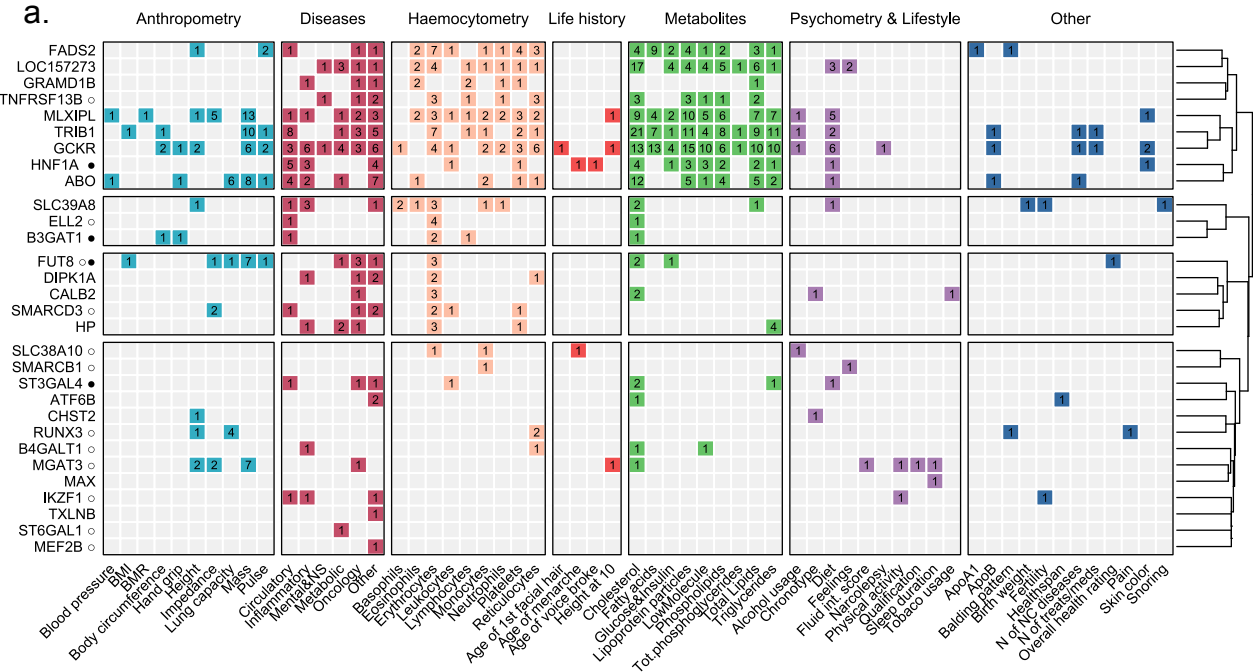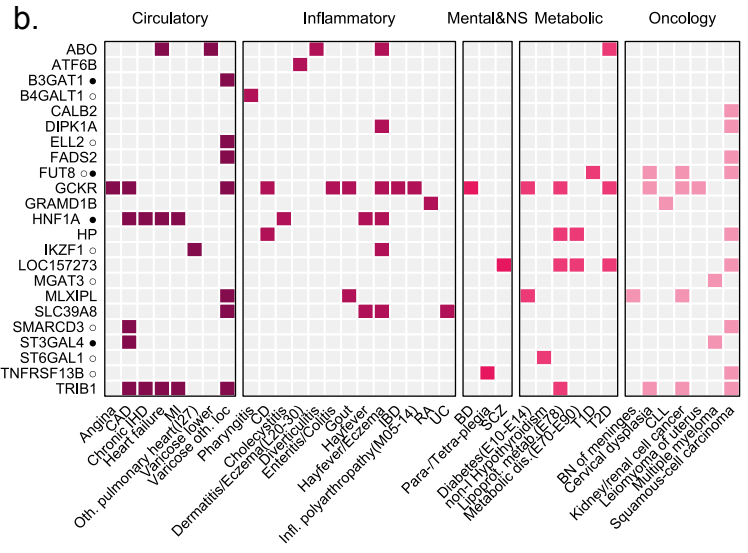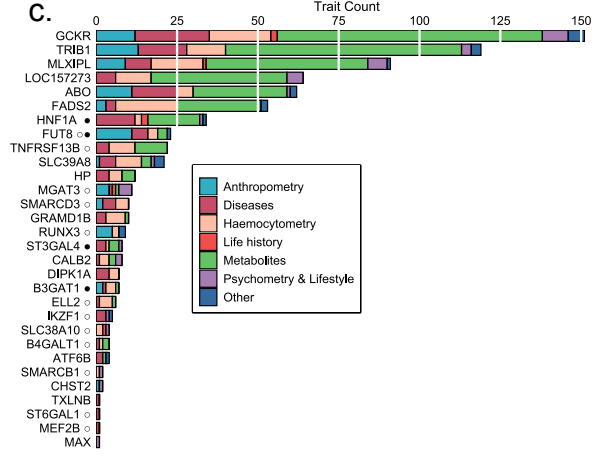

Source: https://medrxiv.org/content/10.1101/2024.07.08.24309967v1.full.pdf
